# Supplementary material for: Discovery of [1,2,3]triazolo[4,5-d]pyrimidine derivatives as highly potent, selective, and cellularly active USP28 inhibitors
Source: PubMed Central journal article supplement — Acta Pharm Sin B. 2019 Dec 16;10(8):1476–91. doi: 10.1016/j.apsb.2019.12.008 (PMC7488365; doi:10.1016/j.apsb.2019.12.008), 2019-12-16

Supporting Information for

Original article

Discovery of [1,2,3]triazolo[4,5-*d*]pyrimidine derivatives as highly potent, selective, and cellularly active USP28 inhibitors

Zhenzhen Liu, Taoqian Zhao, Zhonghua Li, Kai Sun, Yundong Fu, Ting Cheng, Jimin Guo, Bin Yu\*, Xiaojing Shi\*, Hongmin Liu\*

School of Pharmaceutical Sciences, Zhengzhou University, Zhengzhou 450001, China

Received 12 August 2019; received in revised form 20 October 2019; accepted 6 December 2019

\*Corresponding authors. Tel./fax: +86 371 67781908.

E-mail addresses: yubin@zzu.edu.cn (Bin Yu), shixiaojing@zzu.edu.cn (Xiaojing Shi), liuhm@zzu.edu.cn (Hongmin Liu).

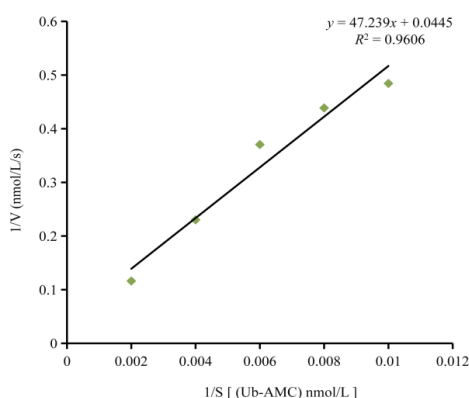

**Figure S1** Determination of the  $K_m$  of USP28 for Ubiquitin-AMC. Varying concentrations of Ubiquitin-AMC were incubated in the presence of 15.625 nmol/L USP28. The diagram shows the mean of  $n = 3$  data for three independent experiments. The initial rate data were fitted to the Michaelis-Menten equation, giving a  $K_m$  value of 1061 nmol/L.

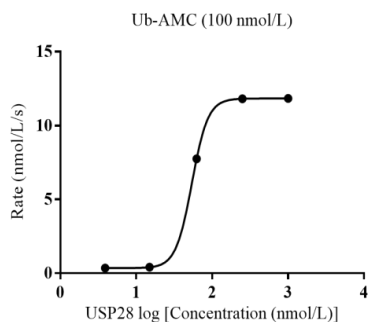

**Figure S2** We employed a screening strategy using purified recombinant USP28 enzyme and a fluorogenic substrate Ub-AMC (100 nmol/L). The  $EC_{50}$  is 54.07 nmol/L. At last, we decided to screen small molecule compounds using purified recombinant USP28 for 62.5 nmol/L.

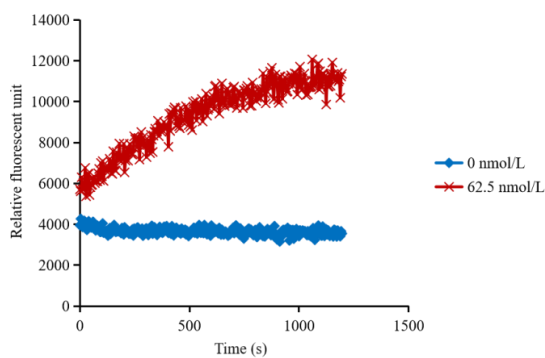

**Figure S3** Representative reaction progress and assay signal following the cleavage of Ubiquitin-AMC by USP28. Reaction time course of 100 nmol/L Ubiquitin-AMC and 62.5 nmol/L USP28. The graph shows representative data for three independent experiments.

### <sup>1</sup>H NMR spectrum of compound 3

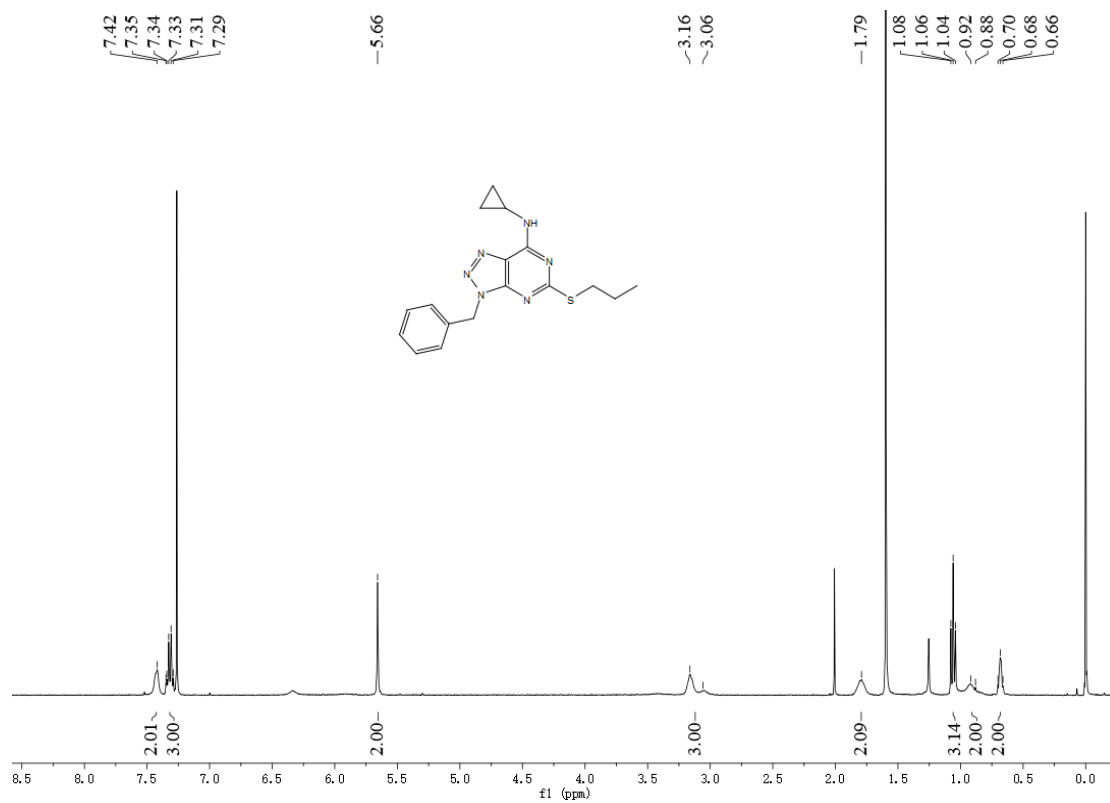

### <sup>13</sup>C NMR spectrum of compound 3

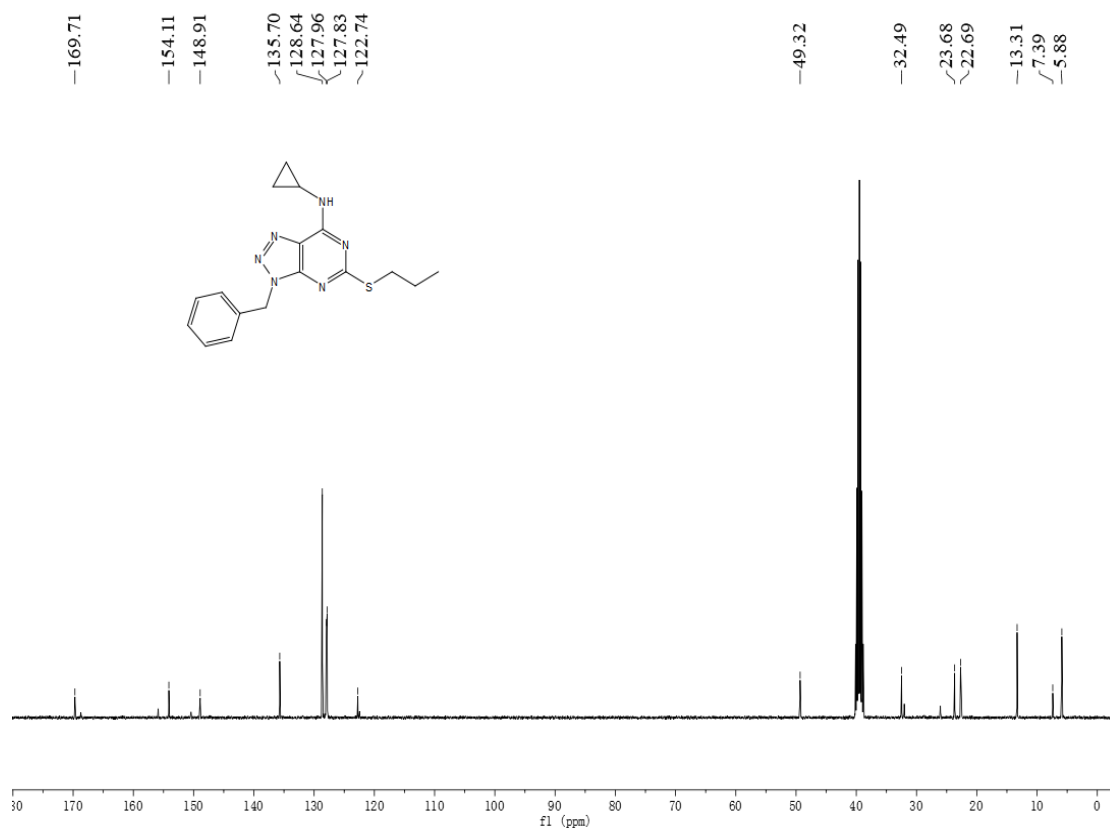

### MS spectrum of compound 3

585 #19 RT: 0.18 AV: 1 NL: 4.94E8  
T: FTMS + p ESI Fullms [100.0000-800.0000]

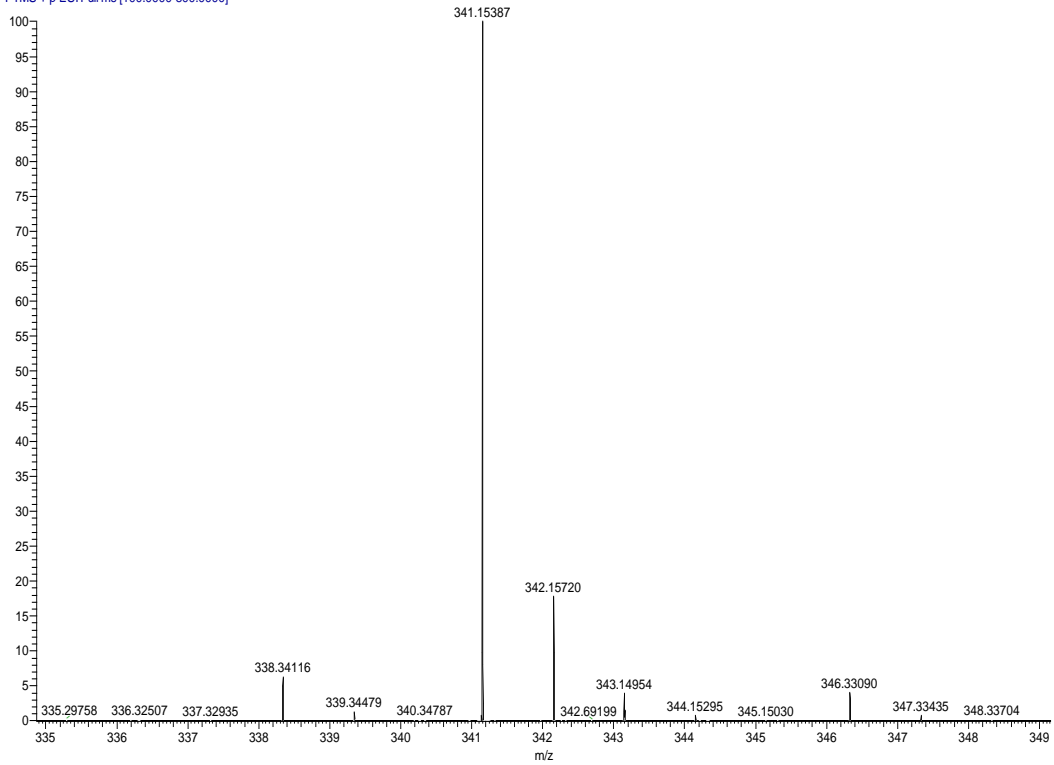

### <sup>1</sup>H NMR spectrum of compound 4

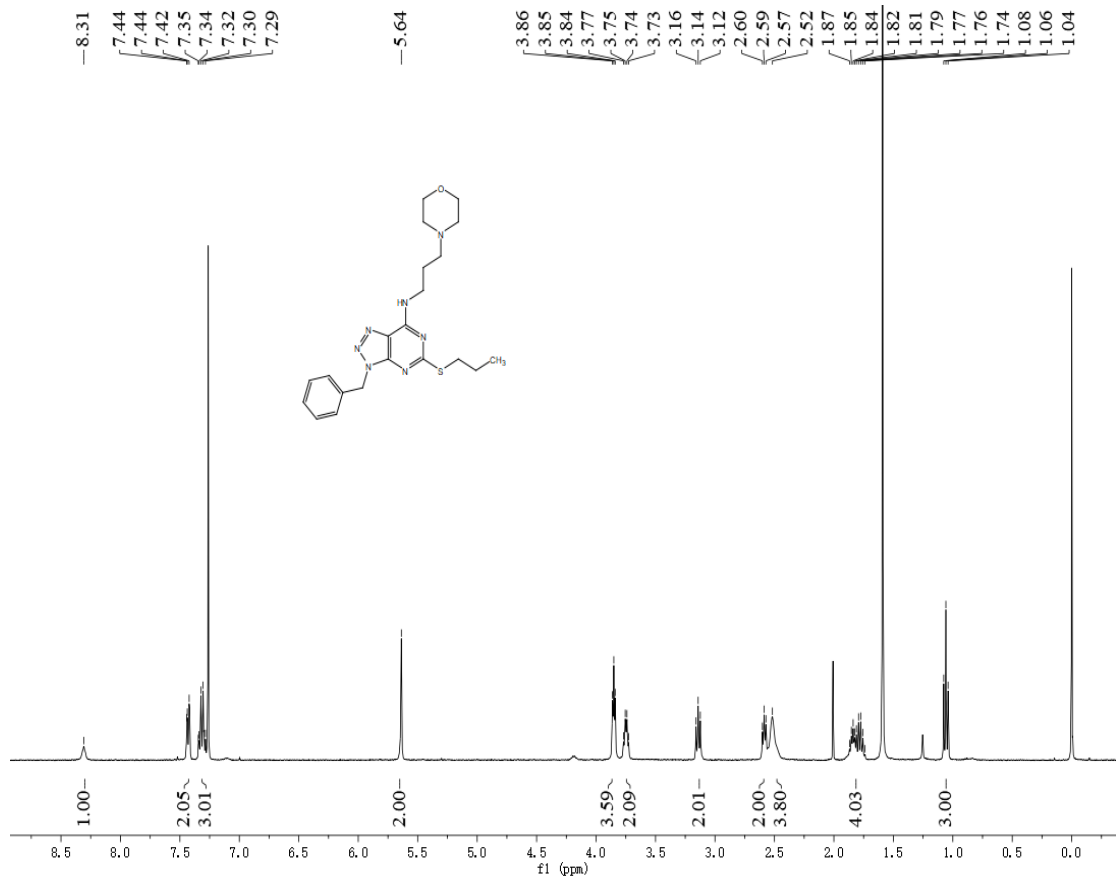

### <sup>13</sup>C NMR spectrum of compound 4

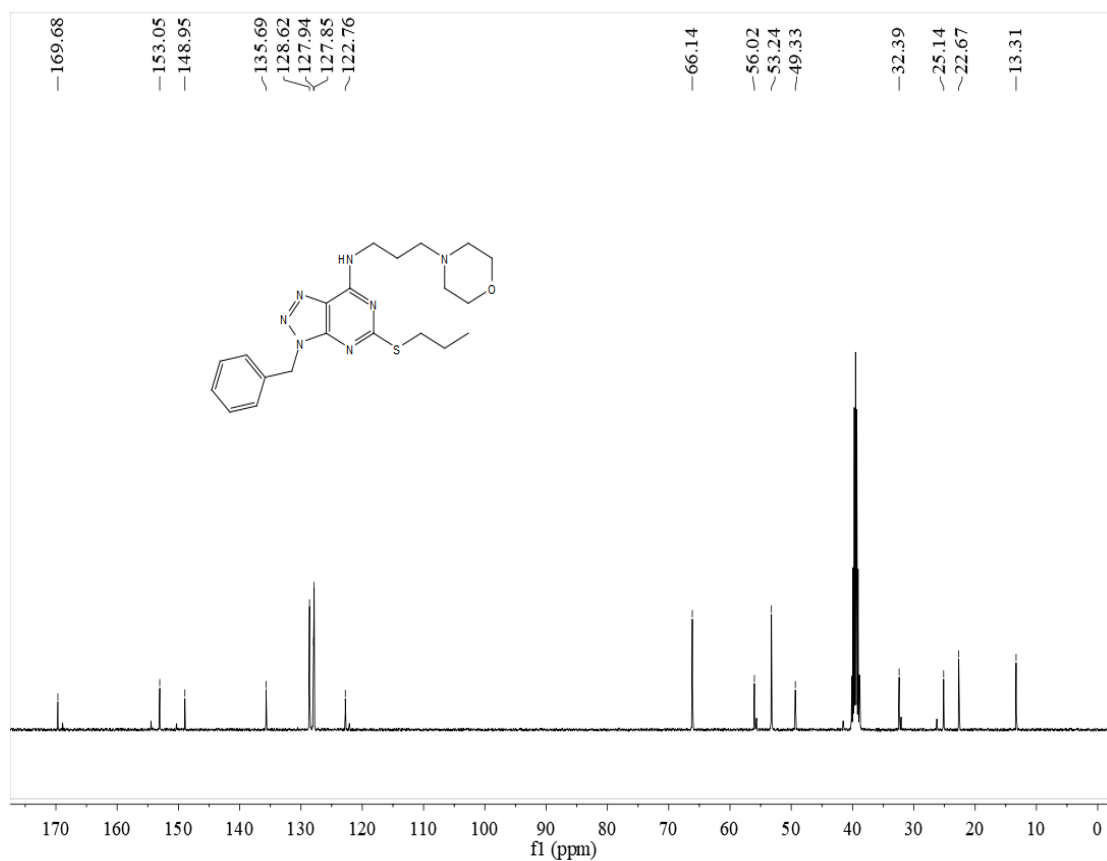

### MS spectrum of compound 4

588 #19 RT: 0.18 AV: 1 NL: 1.45E9  
T: FTMS +p ESI Full ms [100.0000-800.0000]

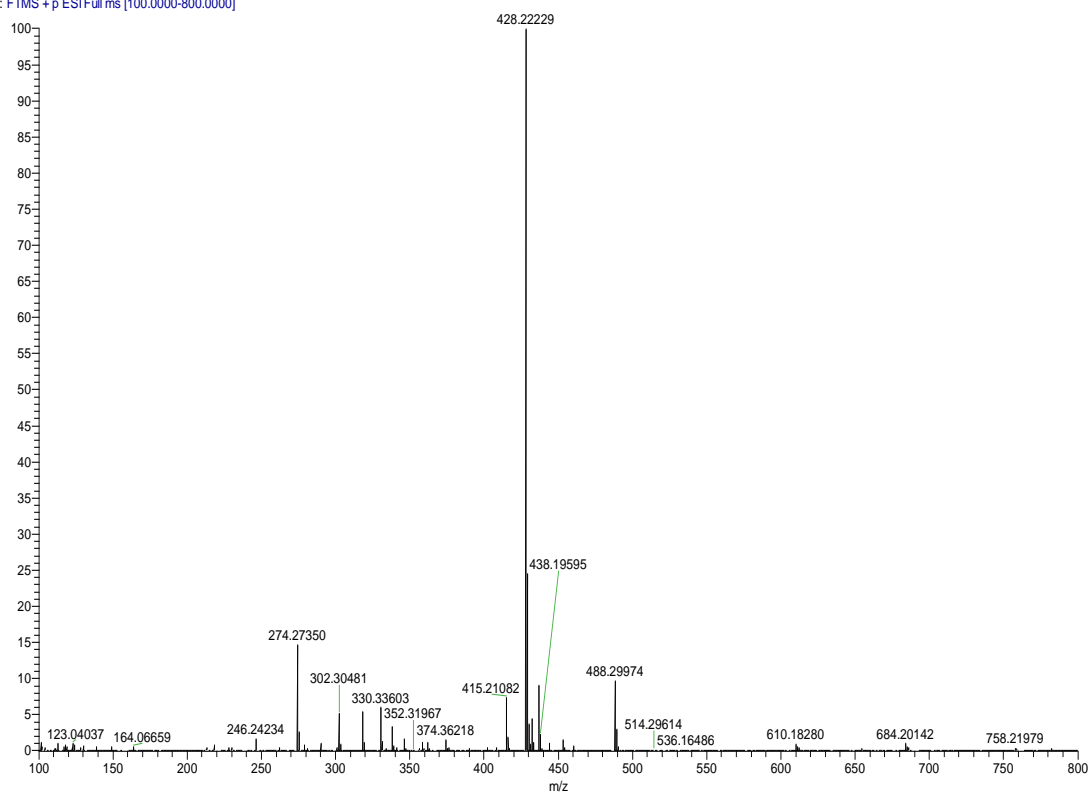

<sup>1</sup>H NMR spectrum of compound 5

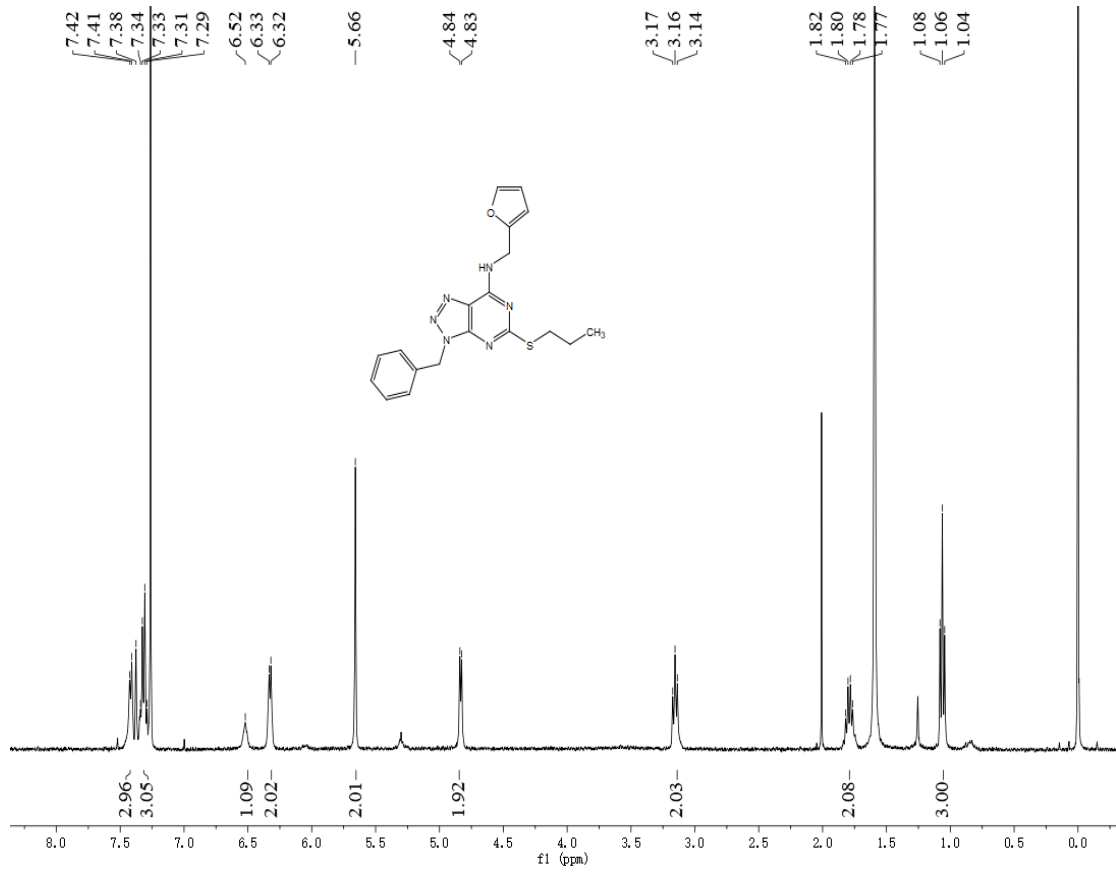

<sup>13</sup>C NMR spectrum of compound 5

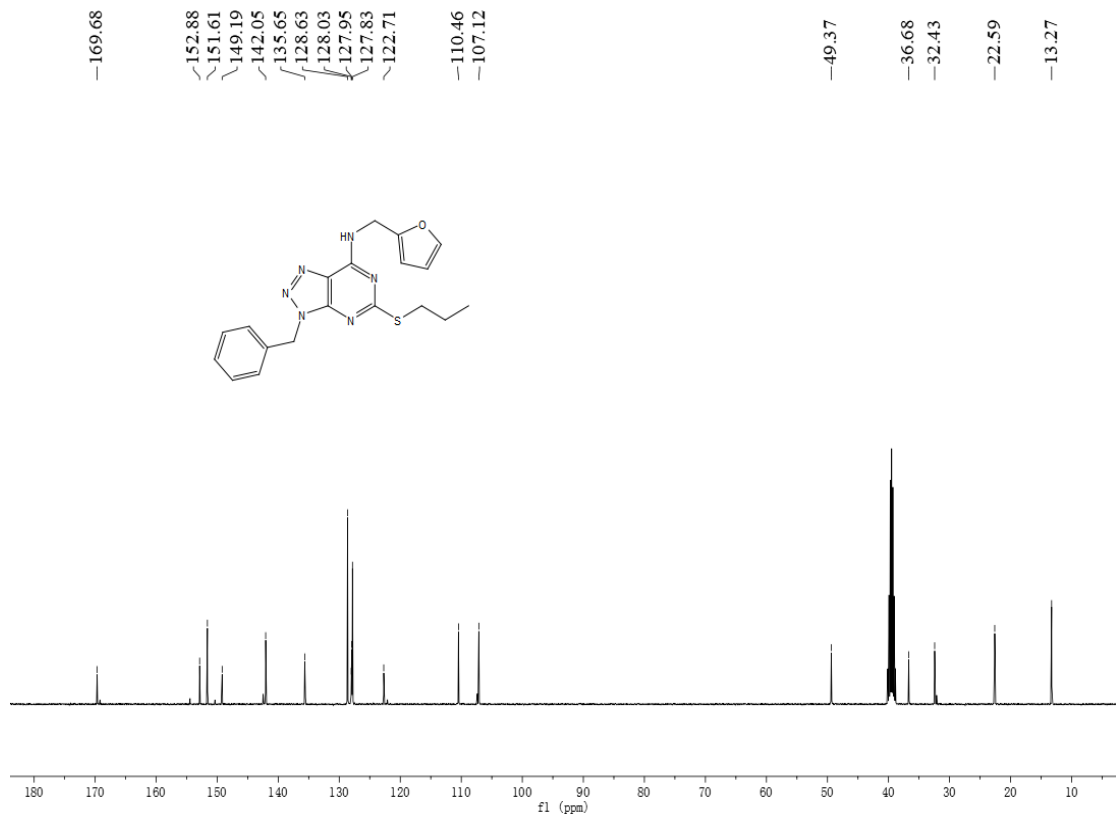

# MS spectrum of compound 5

583 #19 RT: 0.18 AV: 1 NL: 1.25E9  
T: FTMS + p ESI Full ms [100.0000-800.0000]

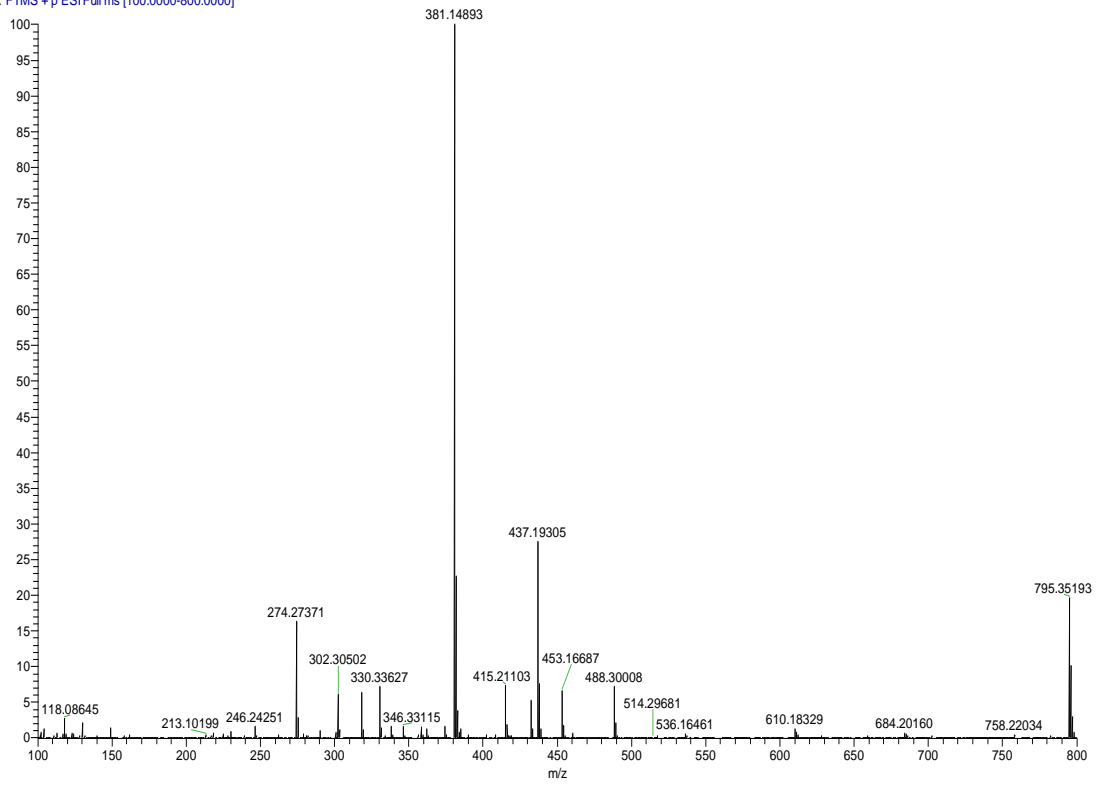

# <sup>1</sup>H NMR spectrum of compound 6

8.66, 8.54, 8.53, 7.72, 7.70, 7.43, 7.41, 7.34, 7.33, 7.31, 7.30, 7.25, 7.24, 7.23, 7.20, -5.66, 4.89, 4.88, 3.14, 3.12, 3.10, 1.80, 1.78, 1.77, 1.75, 1.73, 1.06, 1.04, 1.02

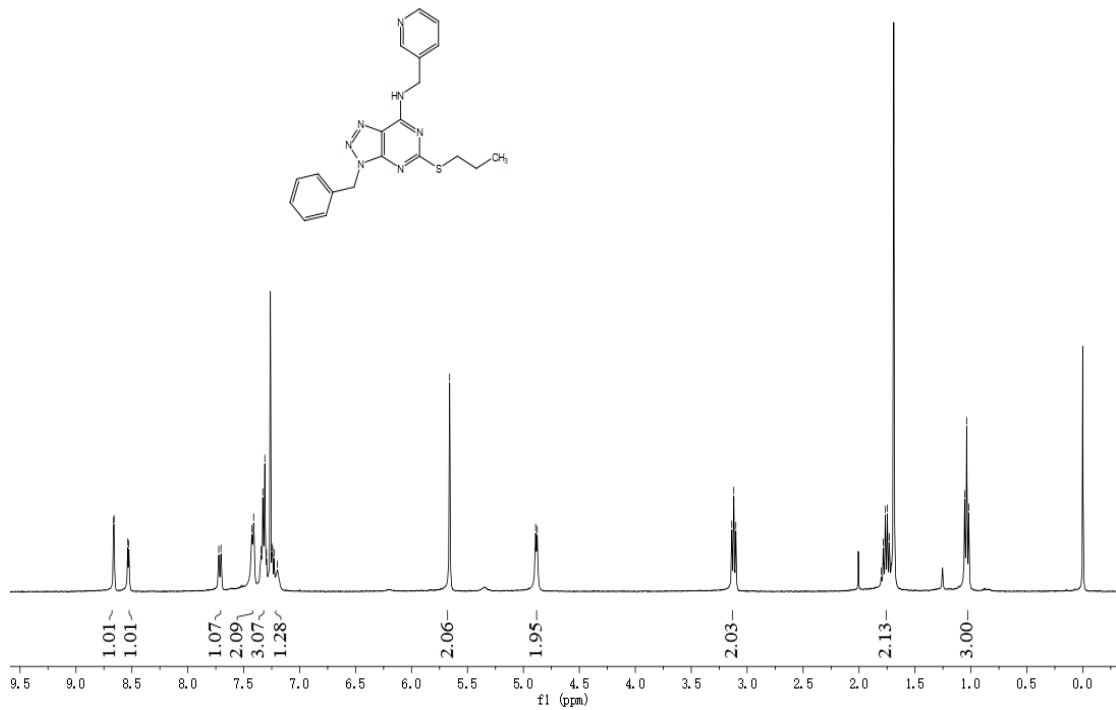

### <sup>13</sup>C NMR spectrum of compound 6

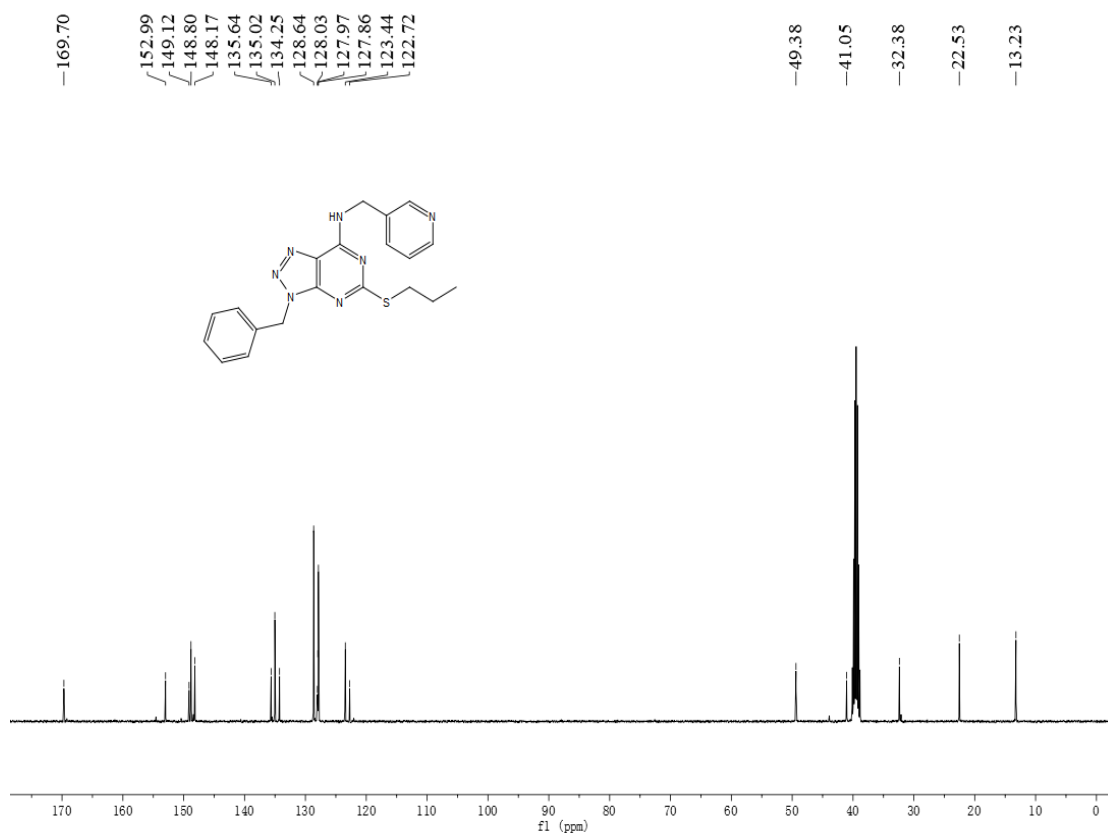

### MS spectrum of compound 6

586 #19 RT: 0.18 AV: 1 NL: 5.05E8  
T: FTMS +p ESI Full ms [100.0000-800.0000]

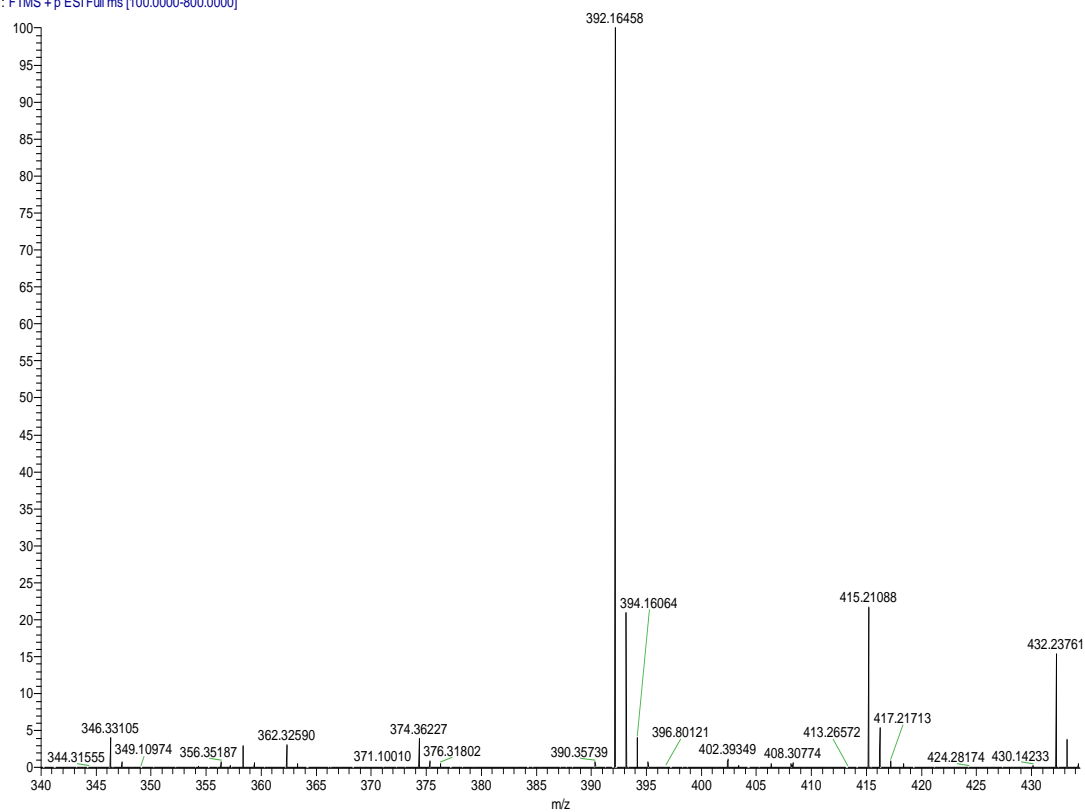



### <sup>1</sup>H NMR spectrum of compound 7

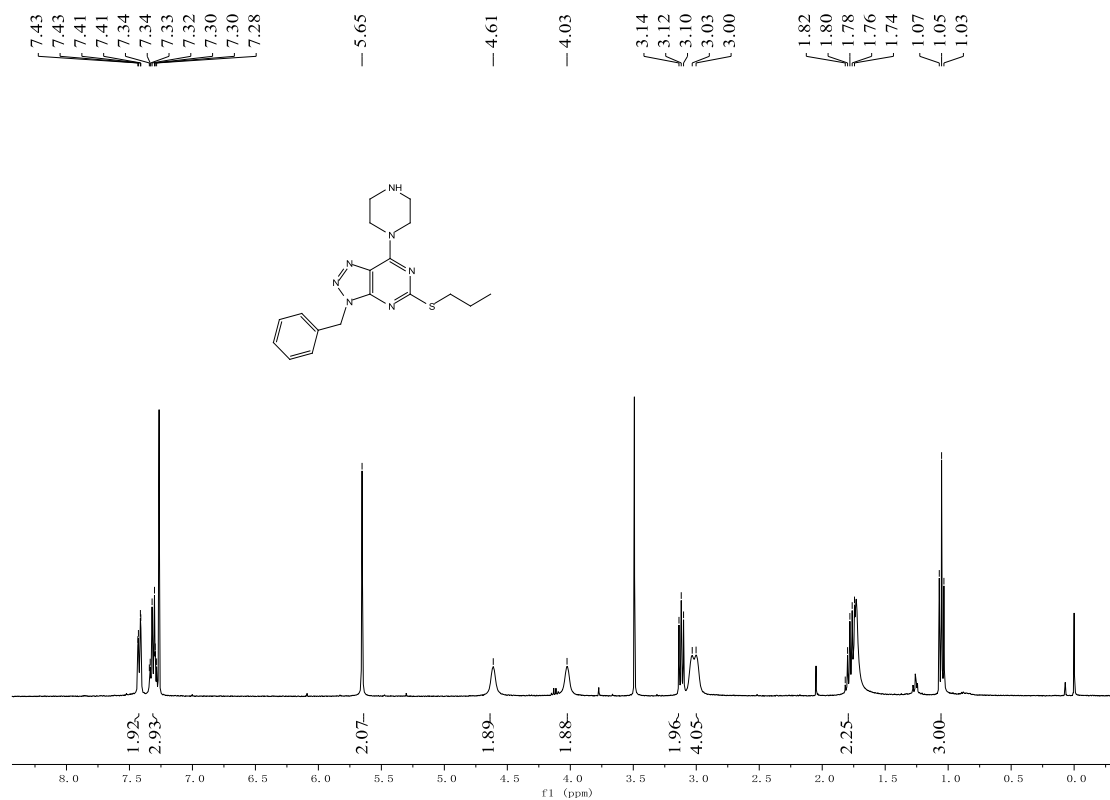

### <sup>13</sup>C NMR spectrum of compound 7

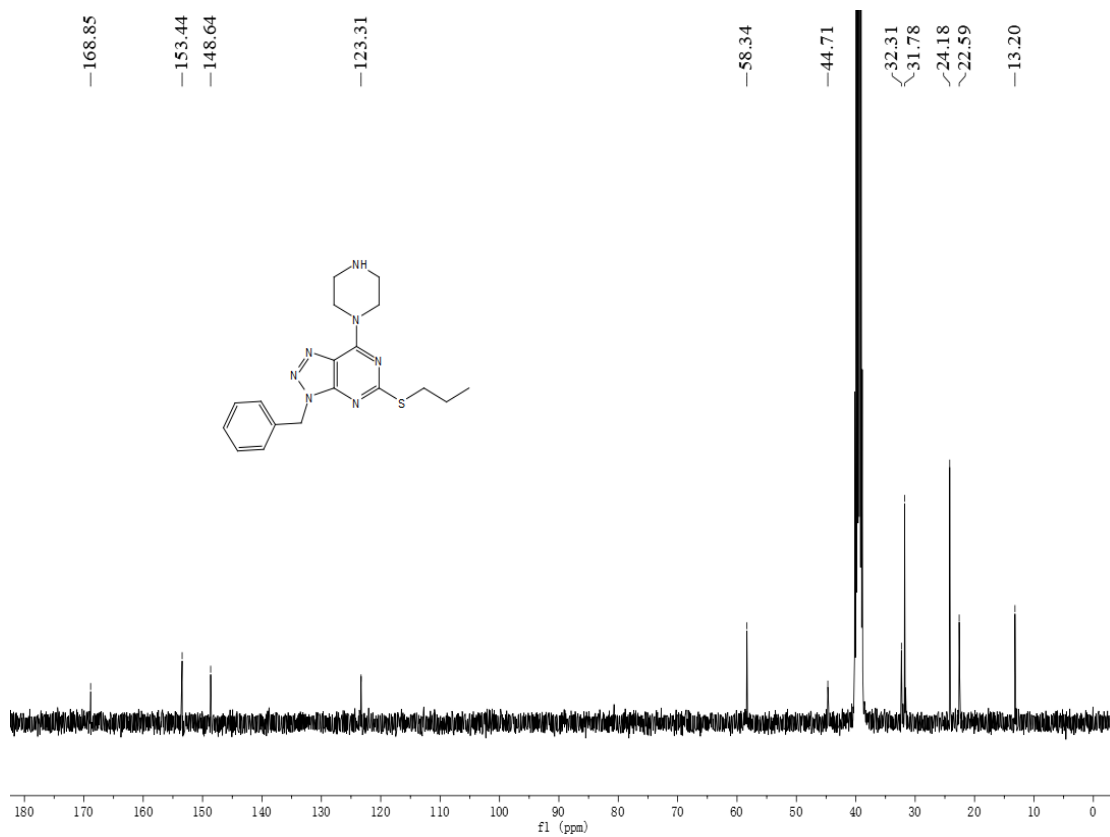

# MS spectrum of compound 7

0224-0 #19 RT: 0.18 AV: 1 NL: 3.42E8  
T: FTMS + p ESI Full ms [100.0000-800.0000]

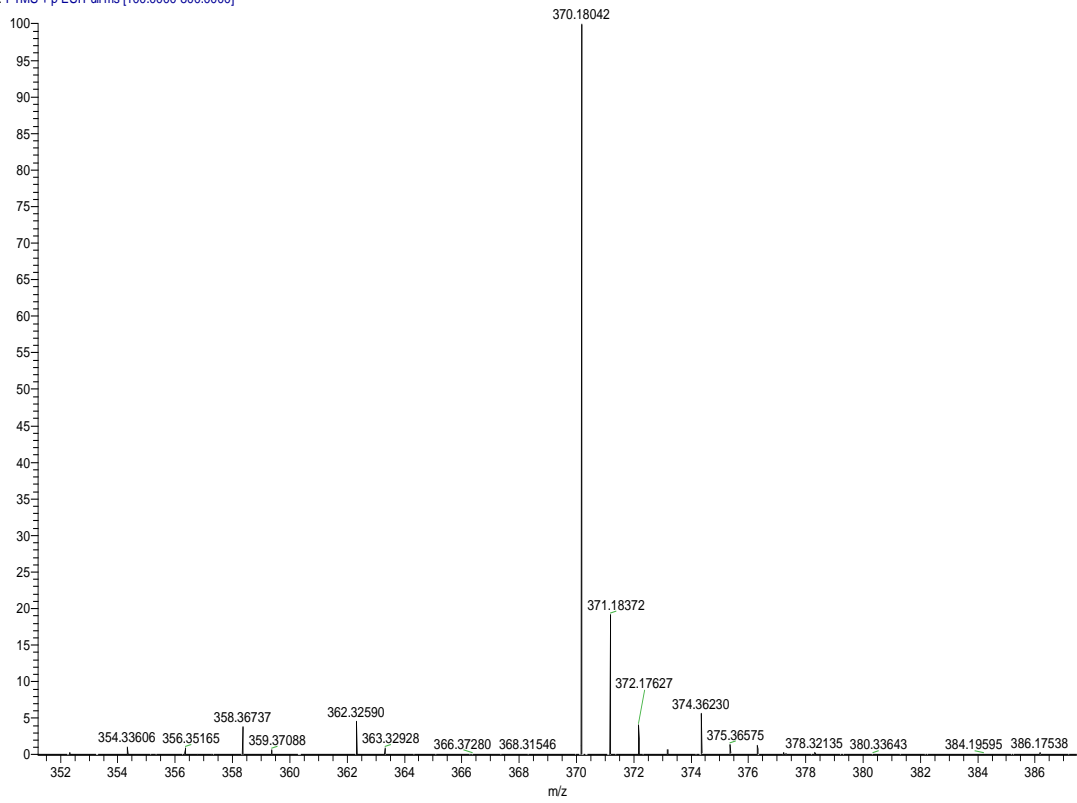

# <sup>1</sup>H NMR spectrum of compound 8

7.36, 7.35, 7.33, 7.31 (multiplet)  
5.70 (singlet)  
3.71, 3.69, 3.12, 3.10, 3.09, 3.06, 3.05 (multiplet)  
1.71, 1.69, 1.67, 1.66, 1.64 (multiplet)  
1.01, 0.99, 0.97 (multiplet)

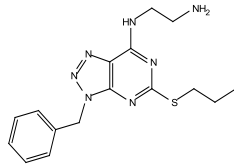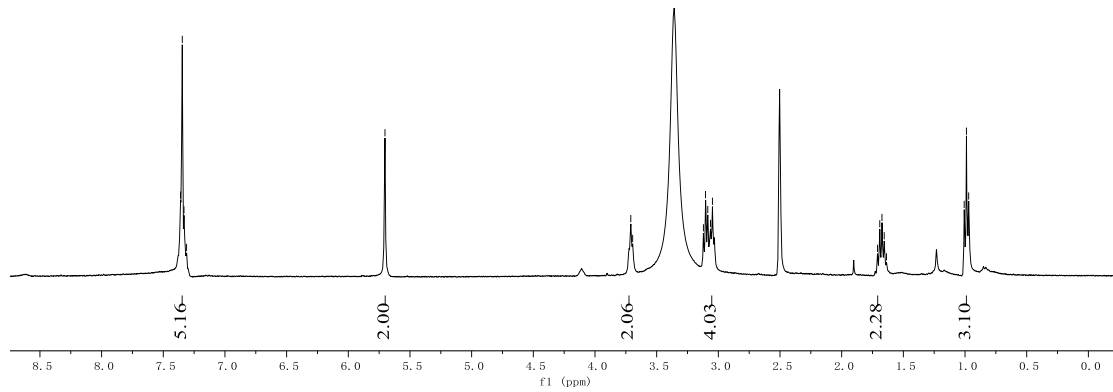

### <sup>13</sup>C NMR spectrum of compound **8**

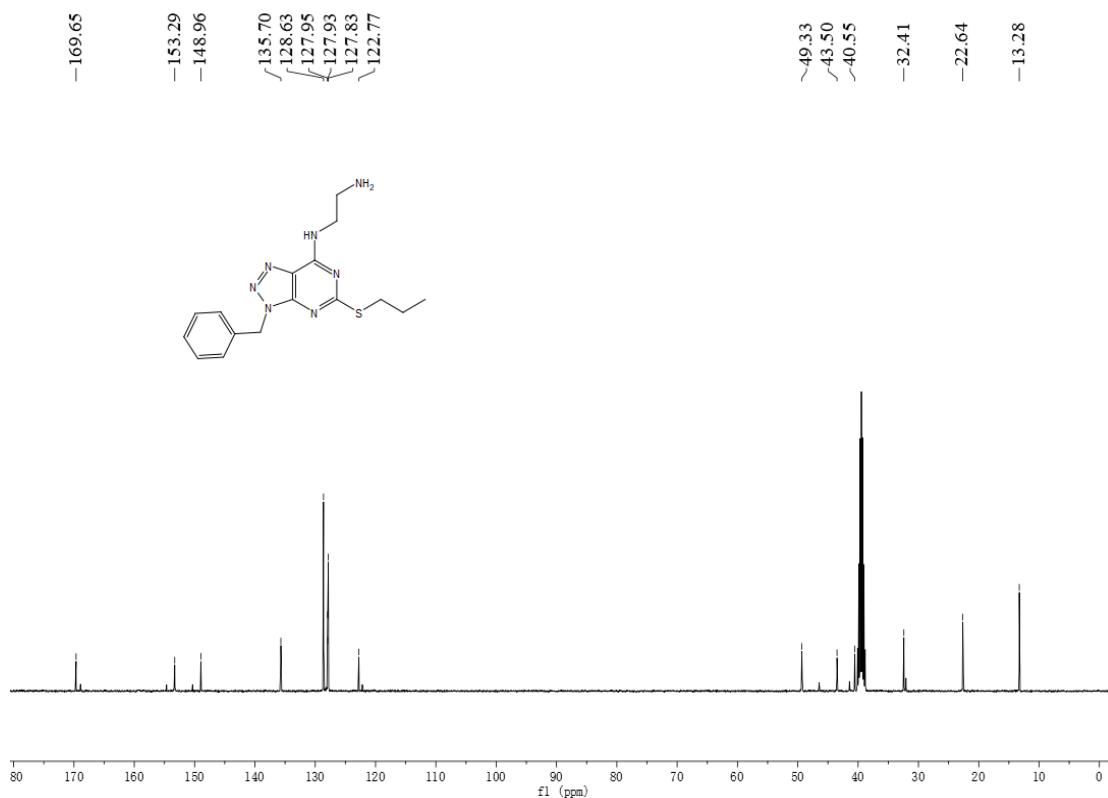

### MS spectrum of compound **8**

0227-1 #19 RT: 0.18 AV: 1 NL: 2.57E8  
T: FTMS+p ESI Full ms [100.0000-800.0000]

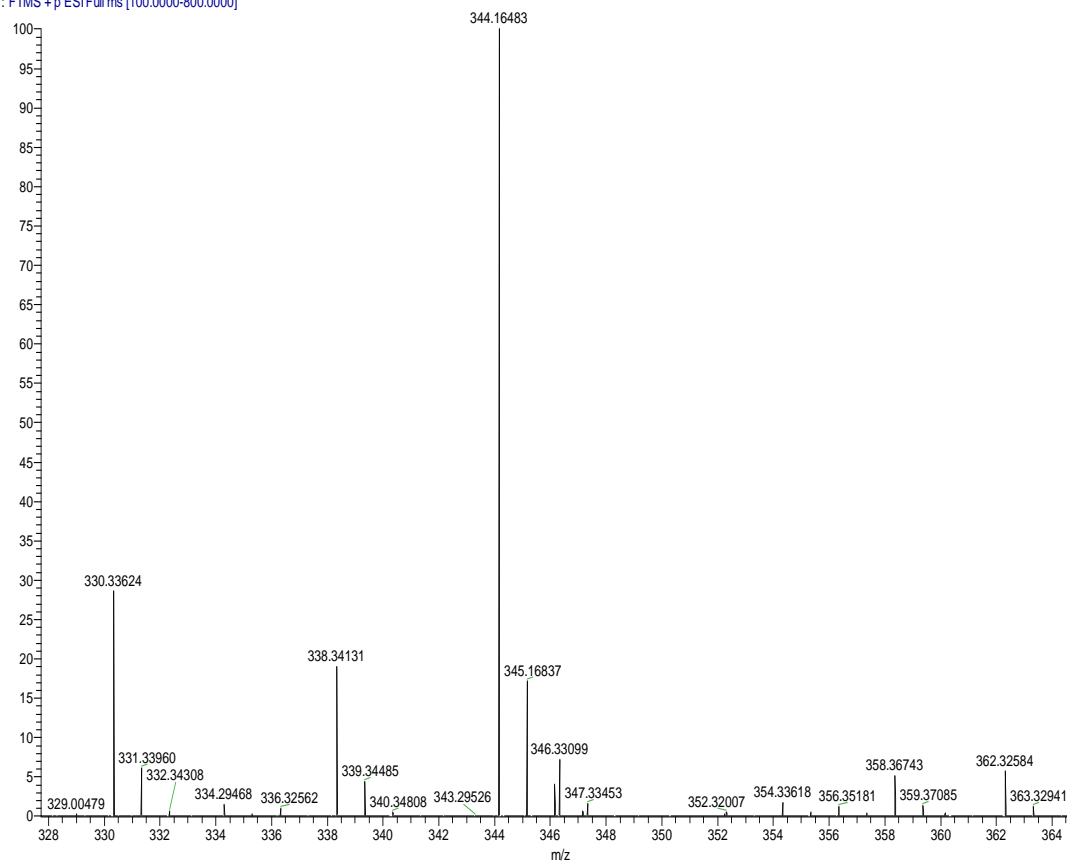

# HPLC spectrum of compound 8

## HPLC chromatogram

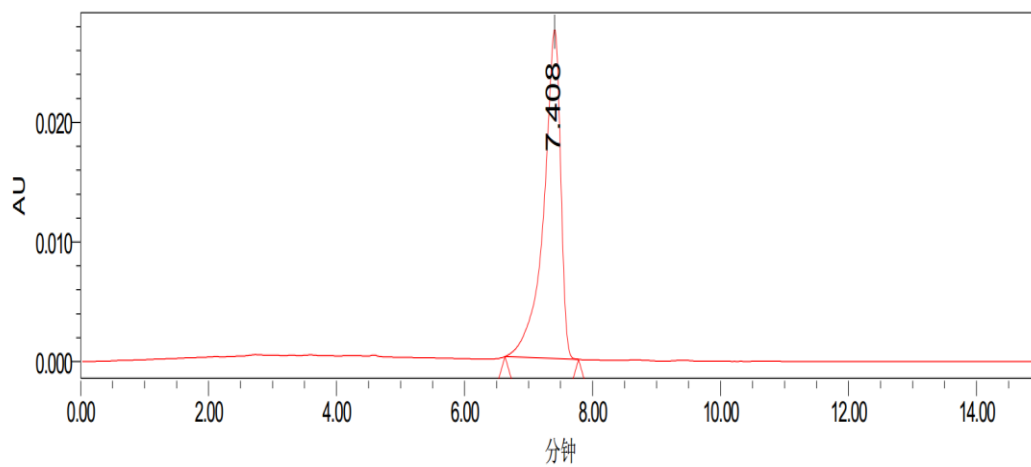

## HPLC chromatogram

| Retention Time(min)<br>(分钟) | Area<br>(微伏*秒) | % Area |        |
|-----------------------------|----------------|--------|--------|
| 1                           | 7.41           | 505333 | 100.00 |

## HPLC chromatogram

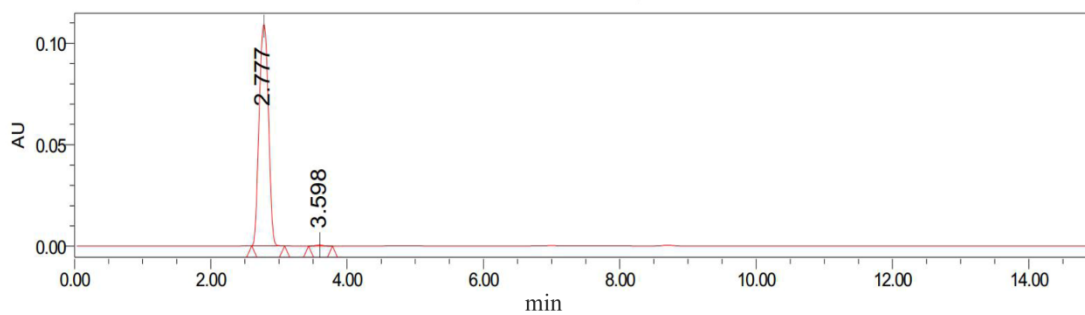

| Retention Time<br>(min) | Area( $\mu\text{v}\cdot\text{s}$ ) | %Area  |
|-------------------------|------------------------------------|--------|
| 7.41                    | 505333                             | 100.00 |

### <sup>1</sup>H NMR spectrum of compound 9

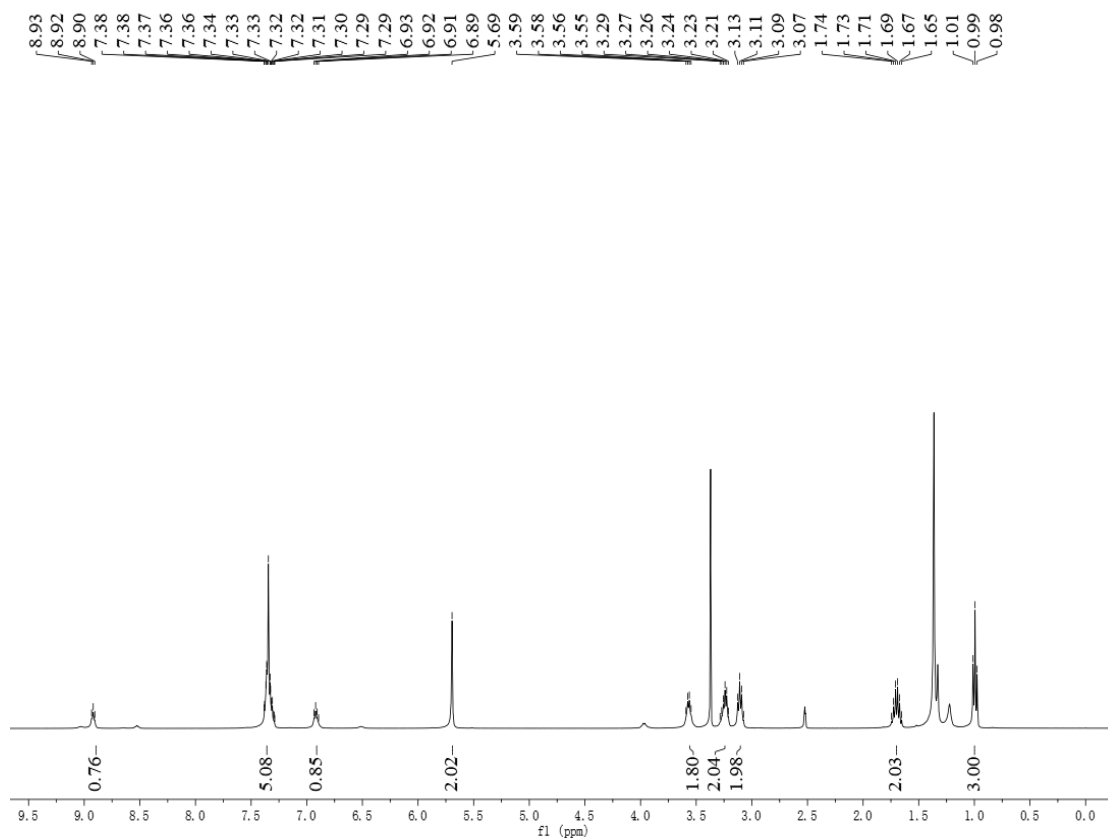

### <sup>13</sup>C NMR spectrum of compound 9

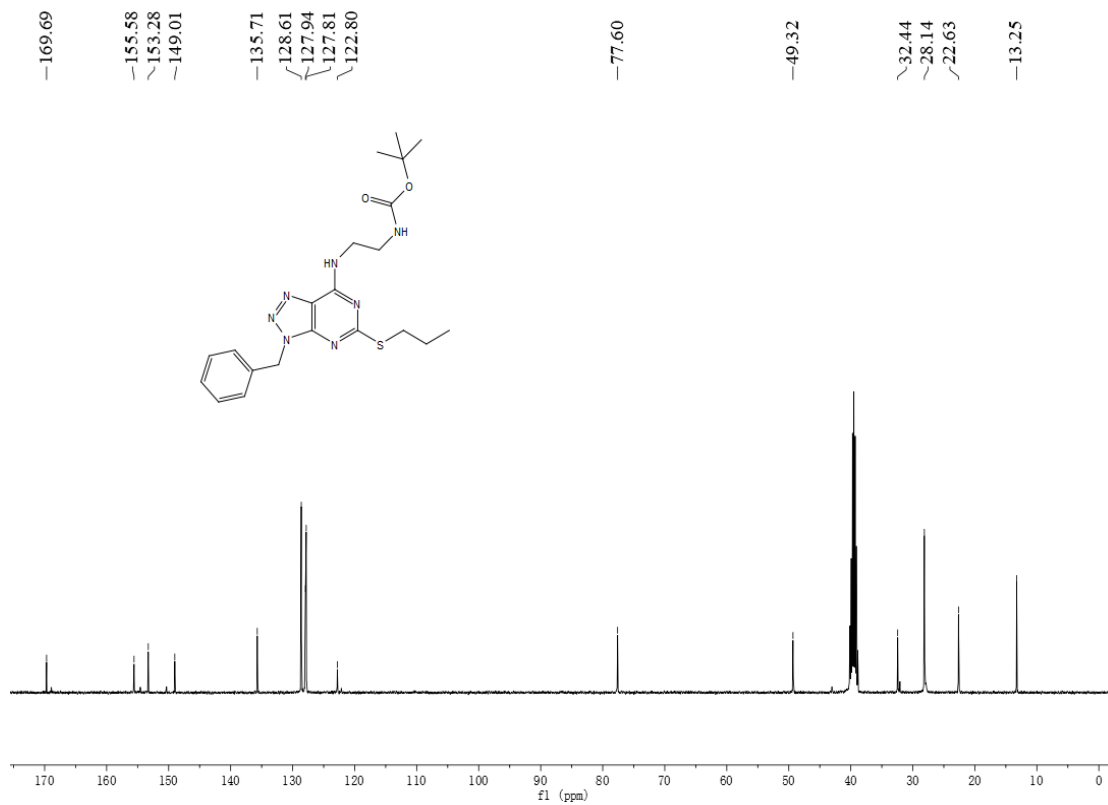

# MS spectrum of compound 9

590 #19 RT: 0.18 AV: 1 NL: 2.54E8  
T: FTMS +p ESI Full ms [100.0000-800.0000]

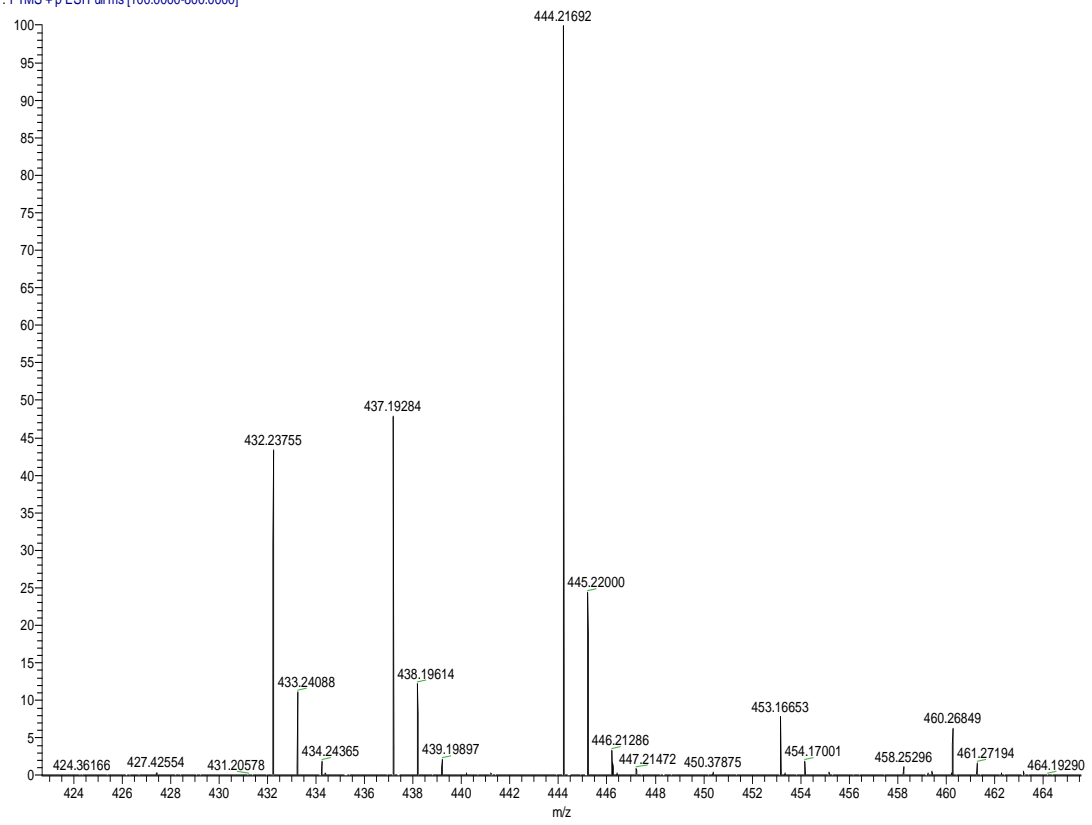

# <sup>1</sup>H NMR spectrum of compound 10

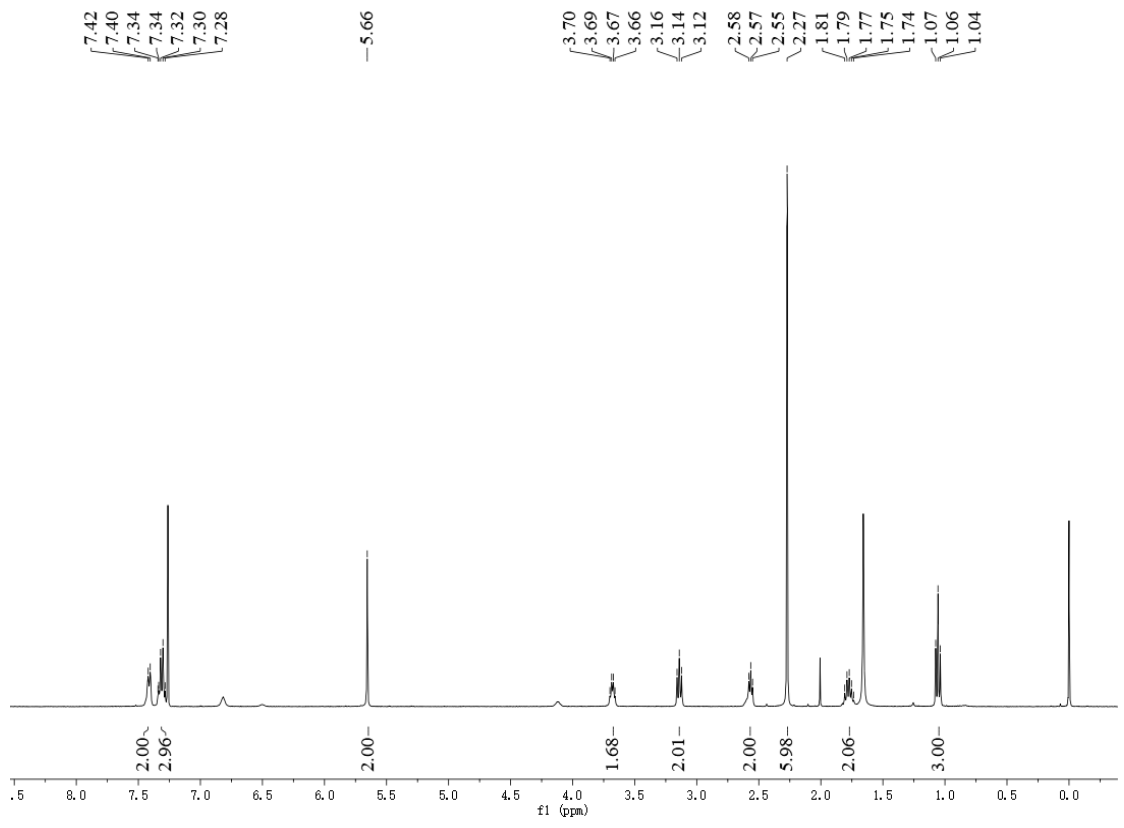

### <sup>13</sup>C NMR spectrum of compound 10

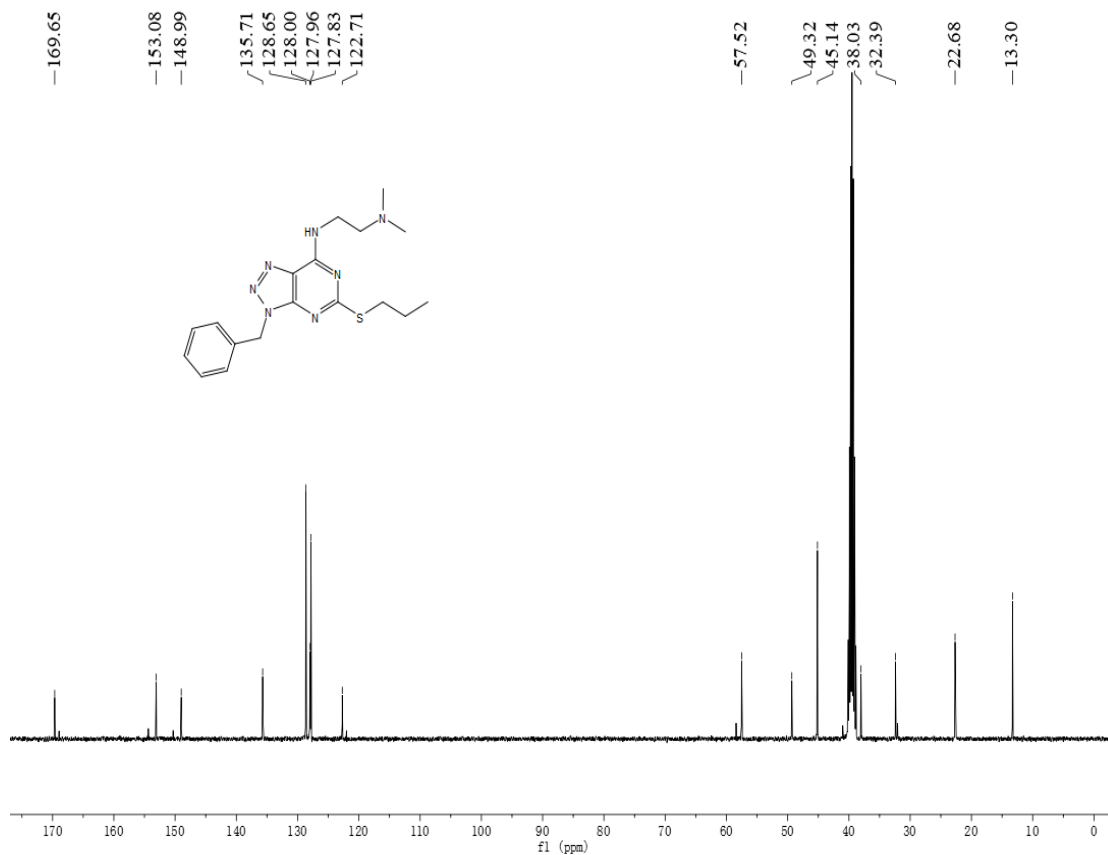

### MS spectrum of compound 10

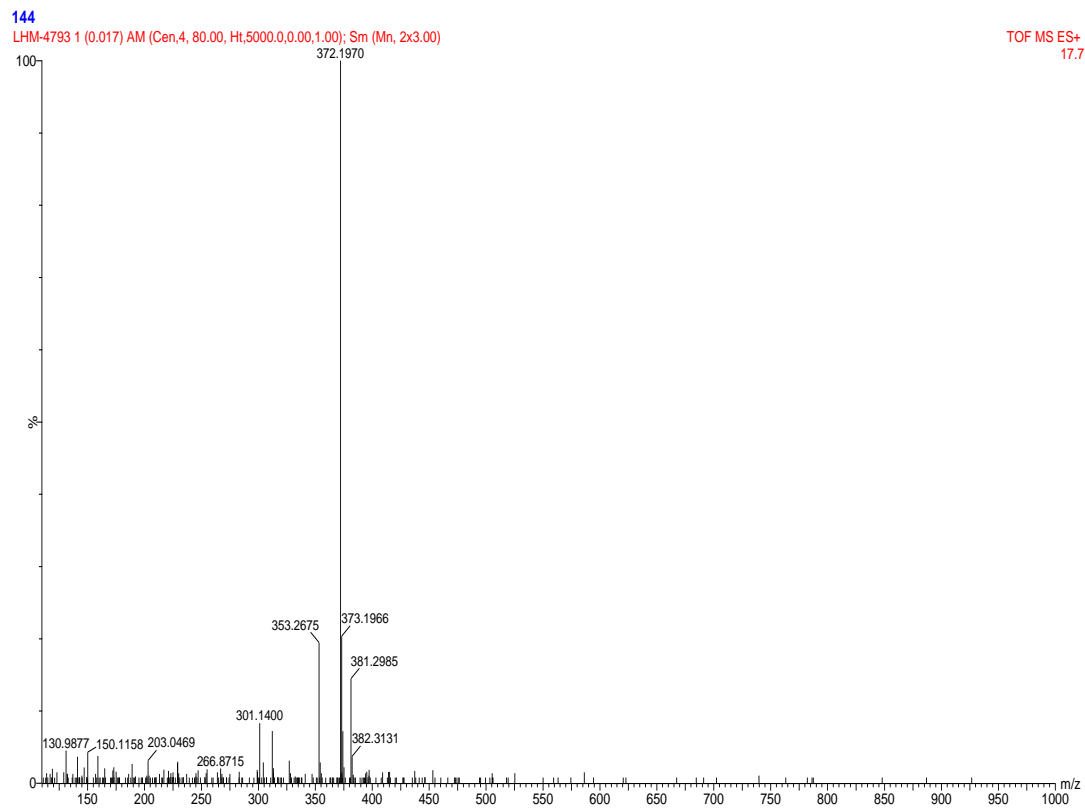

### <sup>1</sup>H NMR spectrum of compound **11**

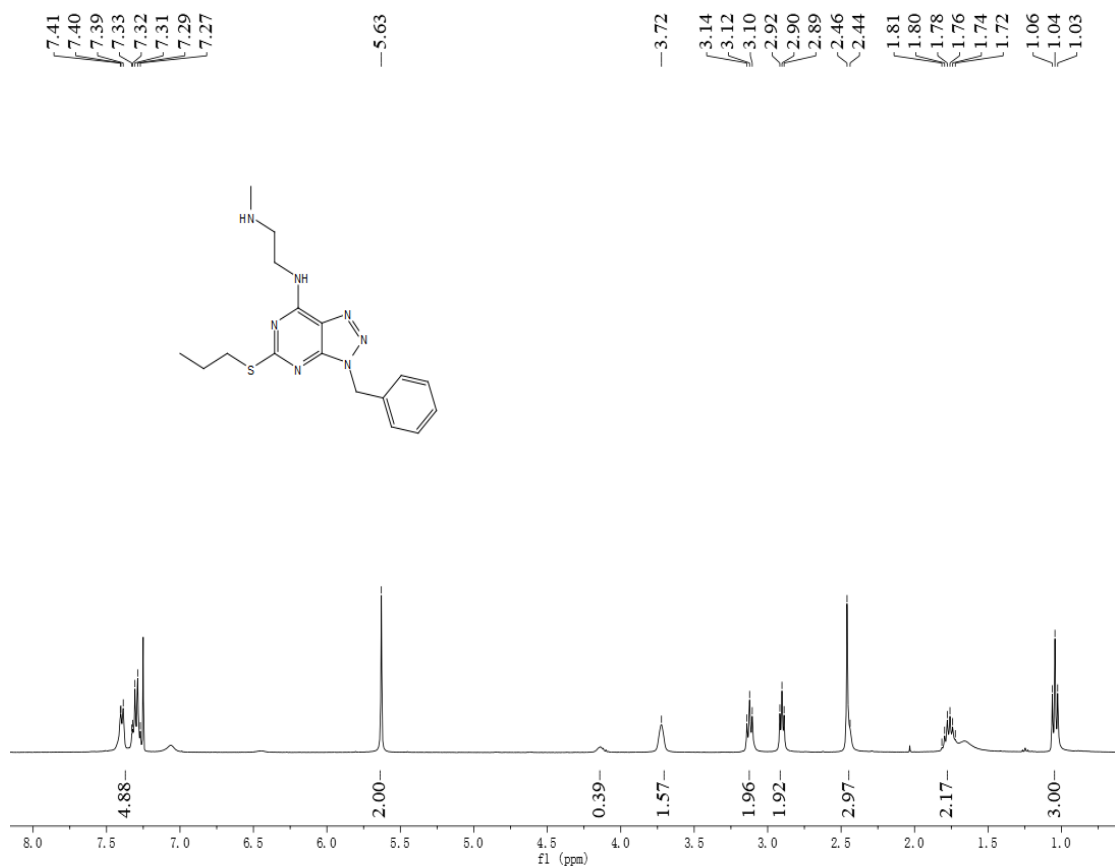

### <sup>13</sup>C NMR spectrum of compound **11**

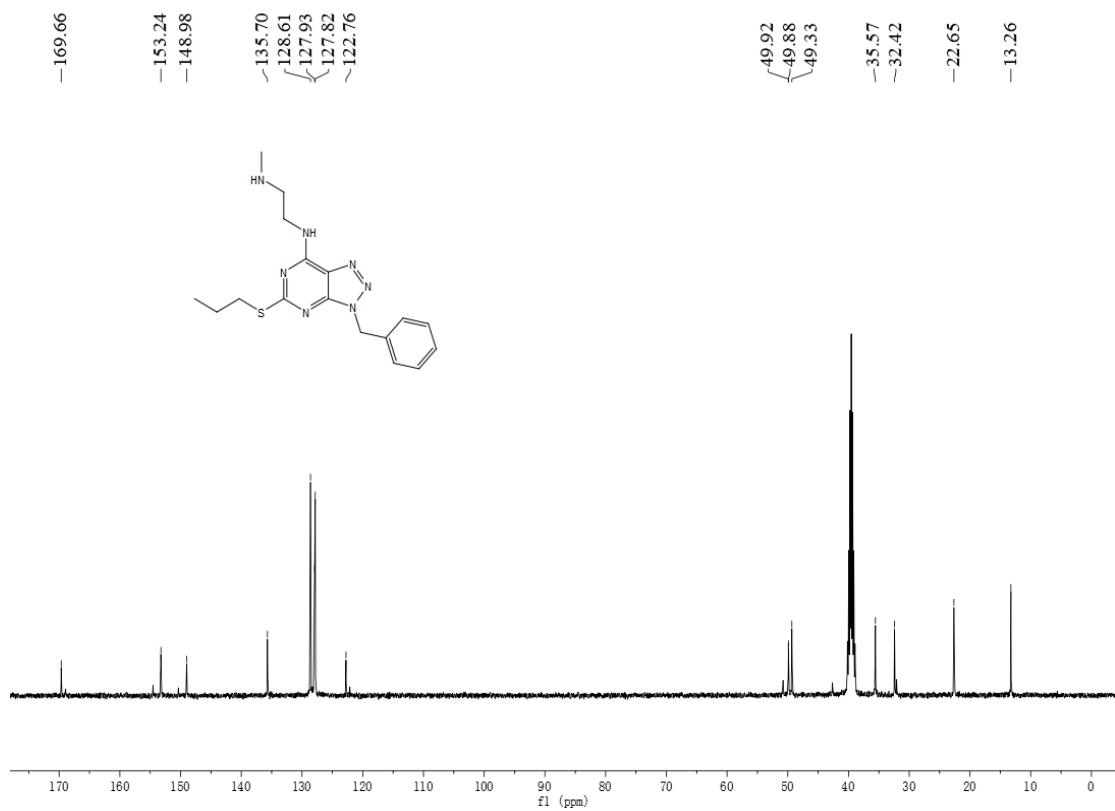



# MS spectrum of compound 11

179

LHM-4802 9 (0.155) AM (Cen,4, 80.00, Ht,5000.0,0.00,1.00); Sm (Mn, 2x3.00); Cm (1:12)

TOF MS ES+  
653

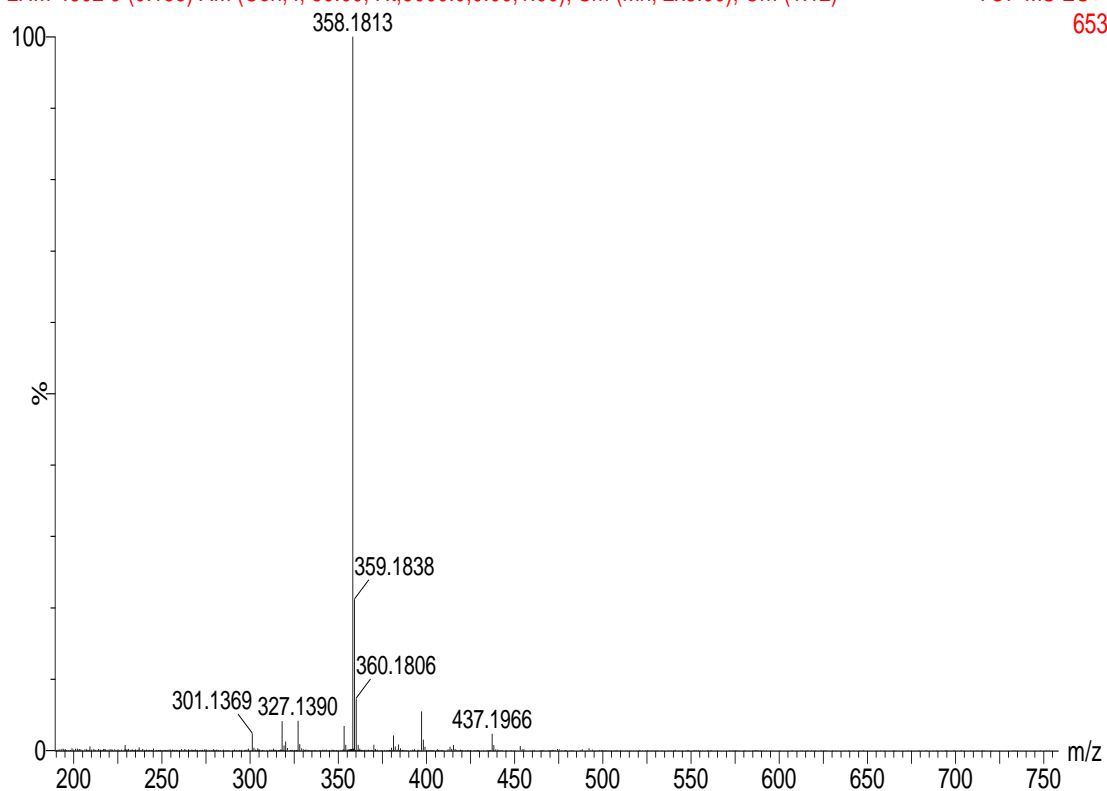

# <sup>1</sup>H NMR spectrum of compound 12

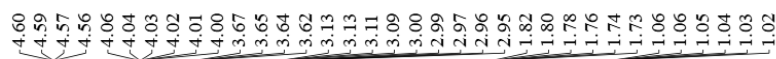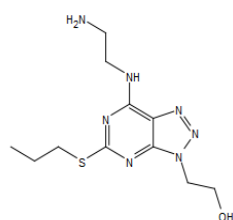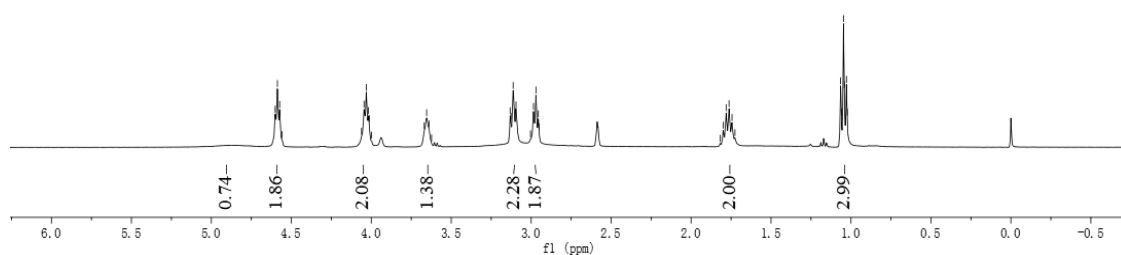

### <sup>13</sup>C NMR spectrum of compound 12

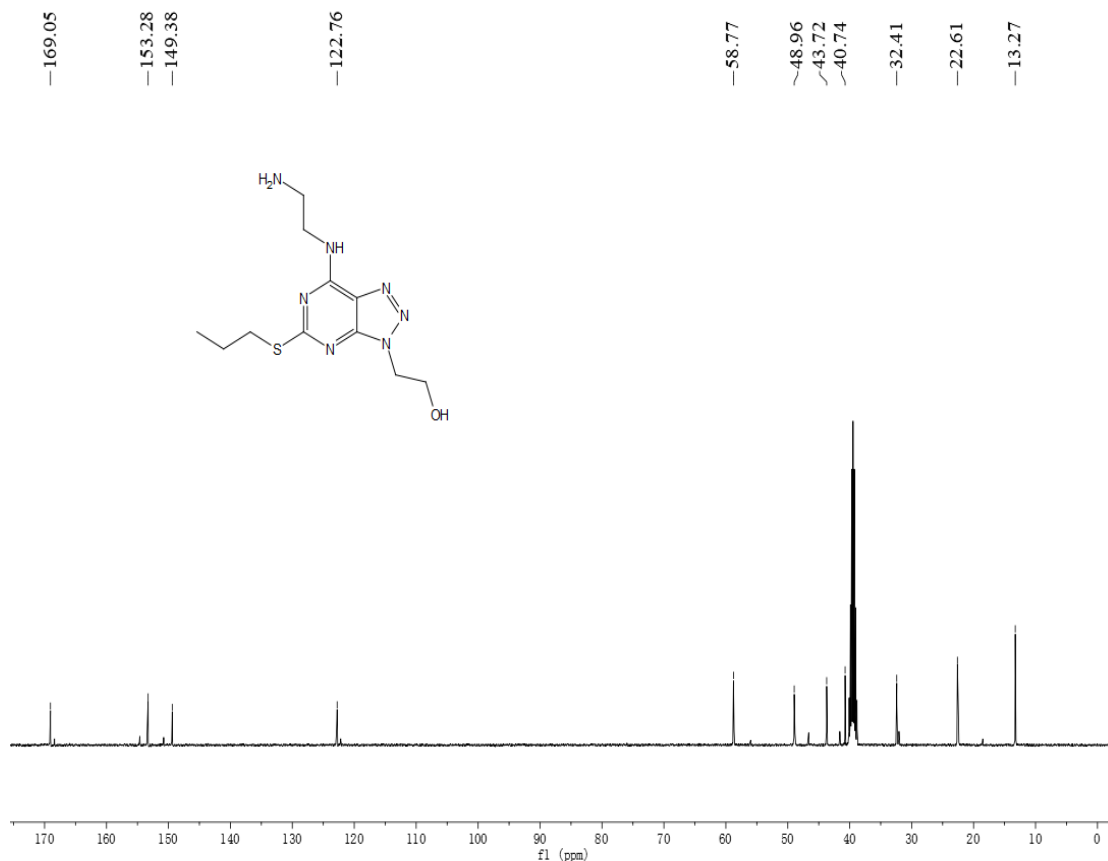

### MS spectrum of compound 12

135

LHM-4786 4 (0.069) AM (Cen,4, 80.00, Ht,5000.0,0.00,1.00); Sm (Mn, 2x3.00); Cm (1:11)

TOF MS ES+  
377

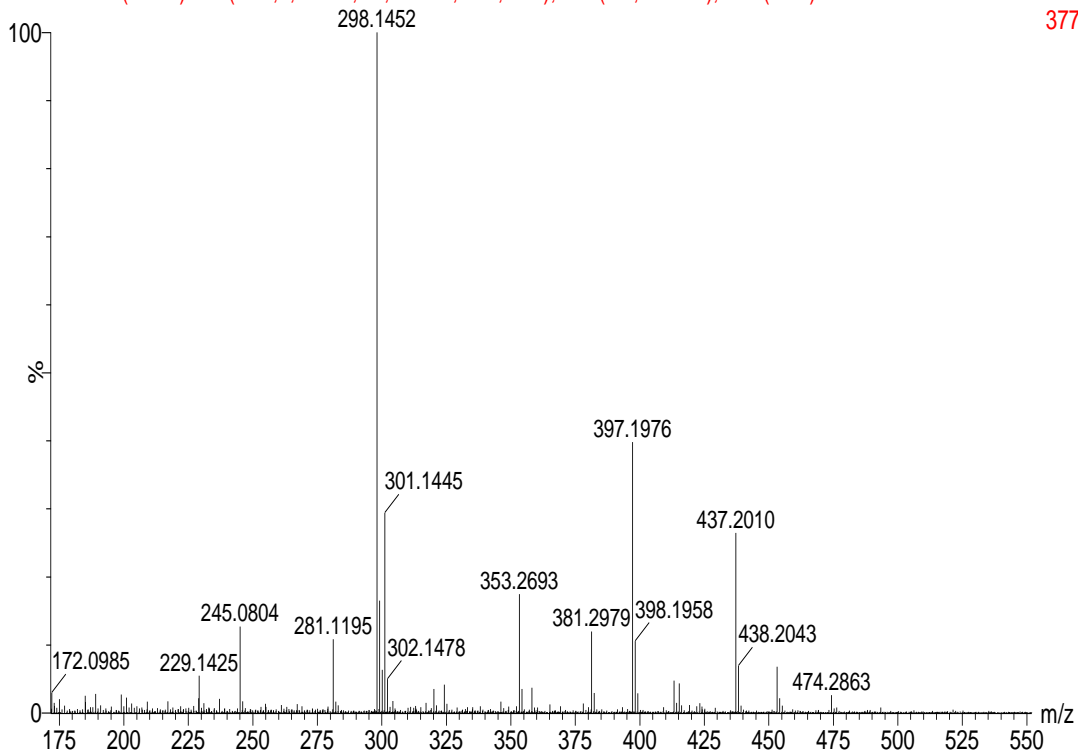

# HPLC spectrum of compound 12

## HPLC chromatogram

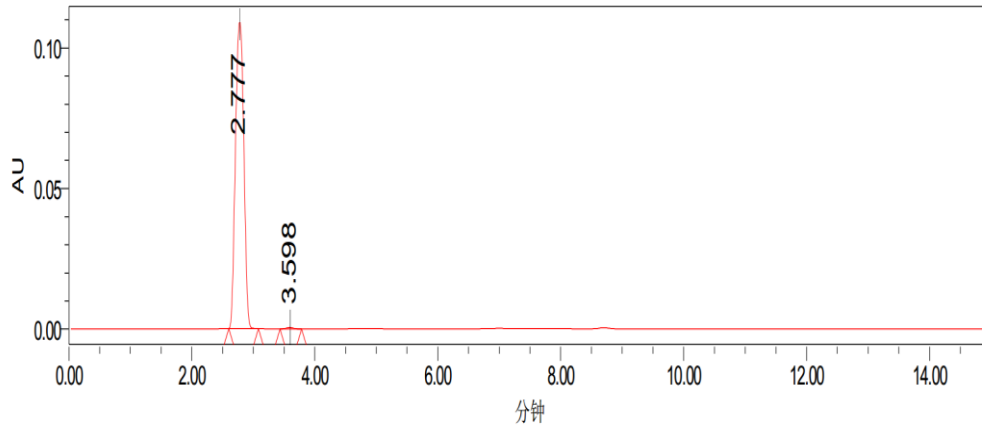

## HPLC chromatogram

| Retention Time(min)<br>(分钟) | Area<br>(微伏*秒) | % Area  |       |
|-----------------------------|----------------|---------|-------|
| 1                           | 2.78           | 1032299 | 99.65 |
| 2                           | 3.60           | 3625    | 0.35  |

## HPLC chromatogram

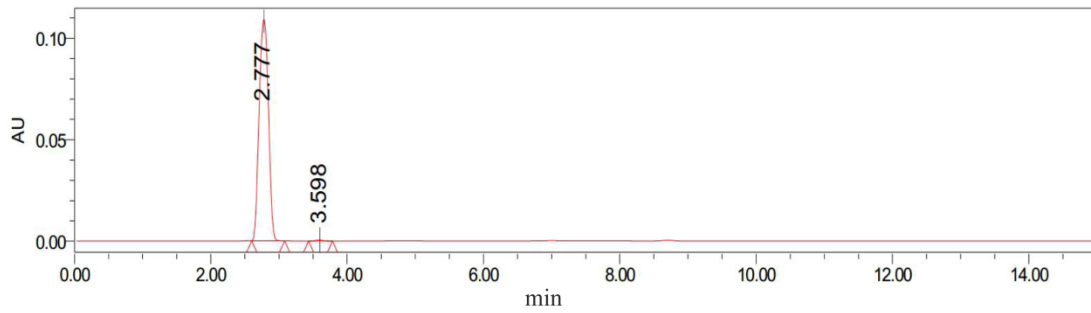

| Retention Time<br>(min) | Area( $\mu\text{v}\cdot\text{s}$ ) | %Area  |
|-------------------------|------------------------------------|--------|
| 7.41                    | 505333                             | 100.00 |

### <sup>1</sup>H NMR spectrum of compound 13

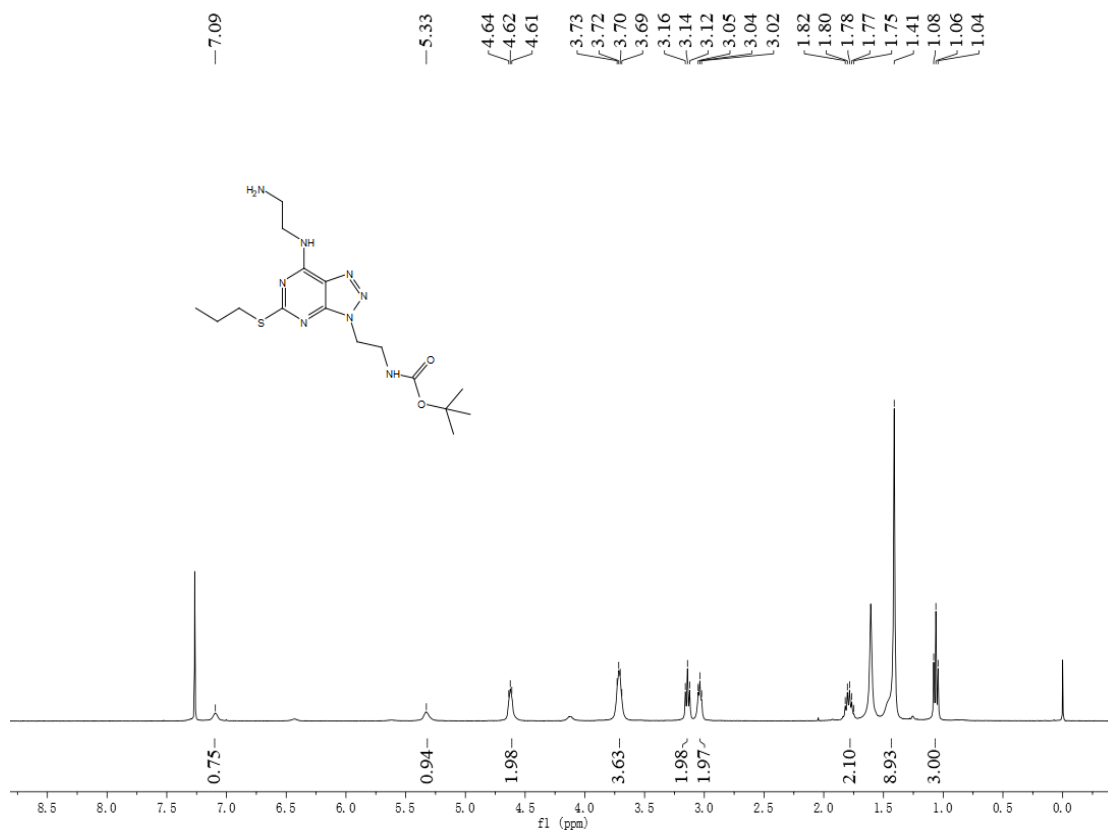

### <sup>13</sup>C NMR spectrum of compound 13

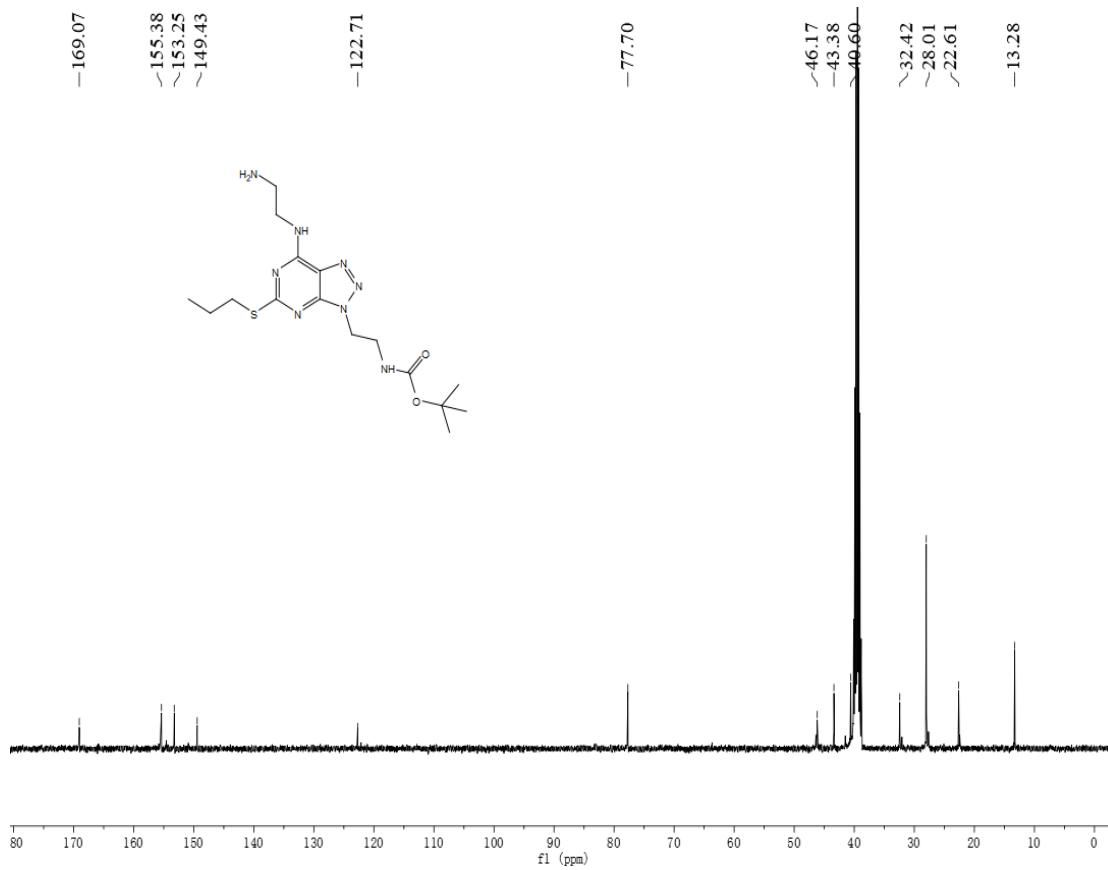

# MS spectrum of compound 13

137

LHM-4788 11 (0.190) AM (Cen,4, 80.00, Ht,5000.0,0.00,1.00); Sm (Mn, 2x3.00); Cm (1:14)

TOF MS ES+  
344

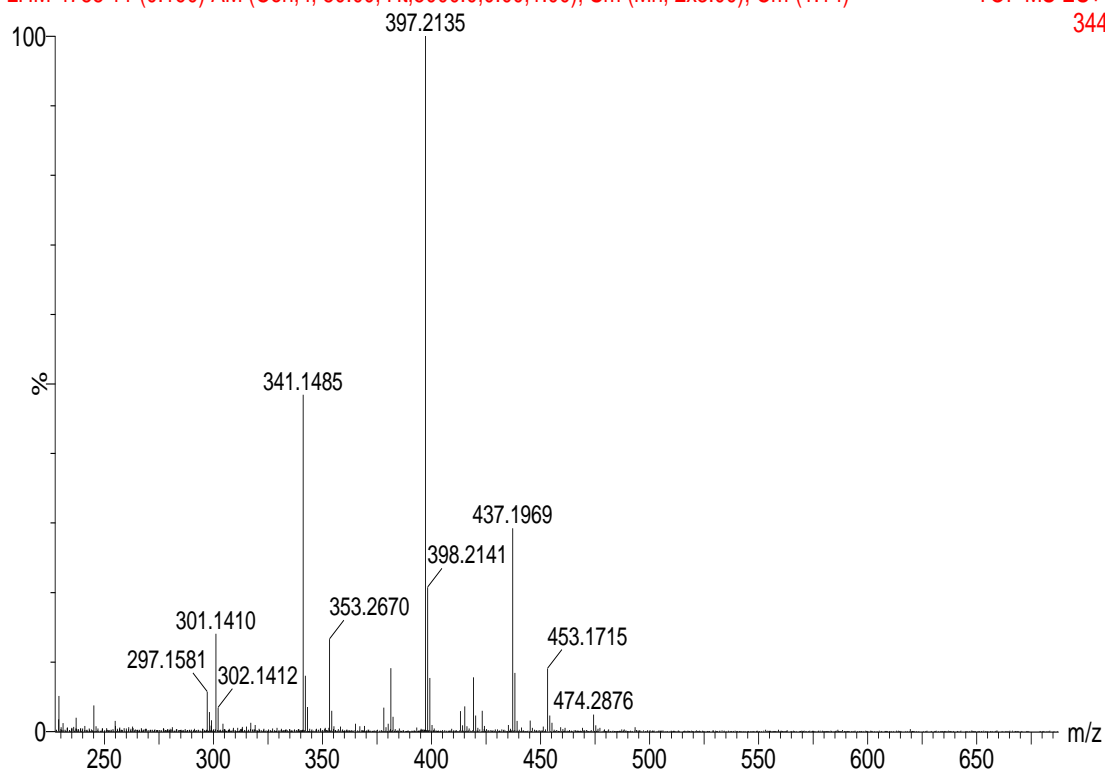

# <sup>1</sup>H NMR spectrum of compound 14

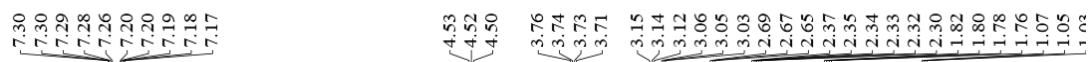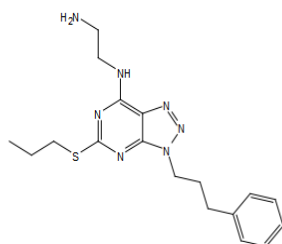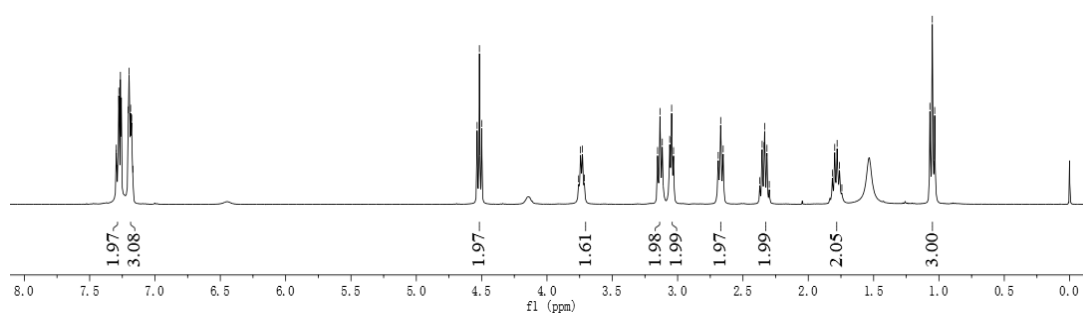

<sup>13</sup>C NMR spectrum of compound **14**

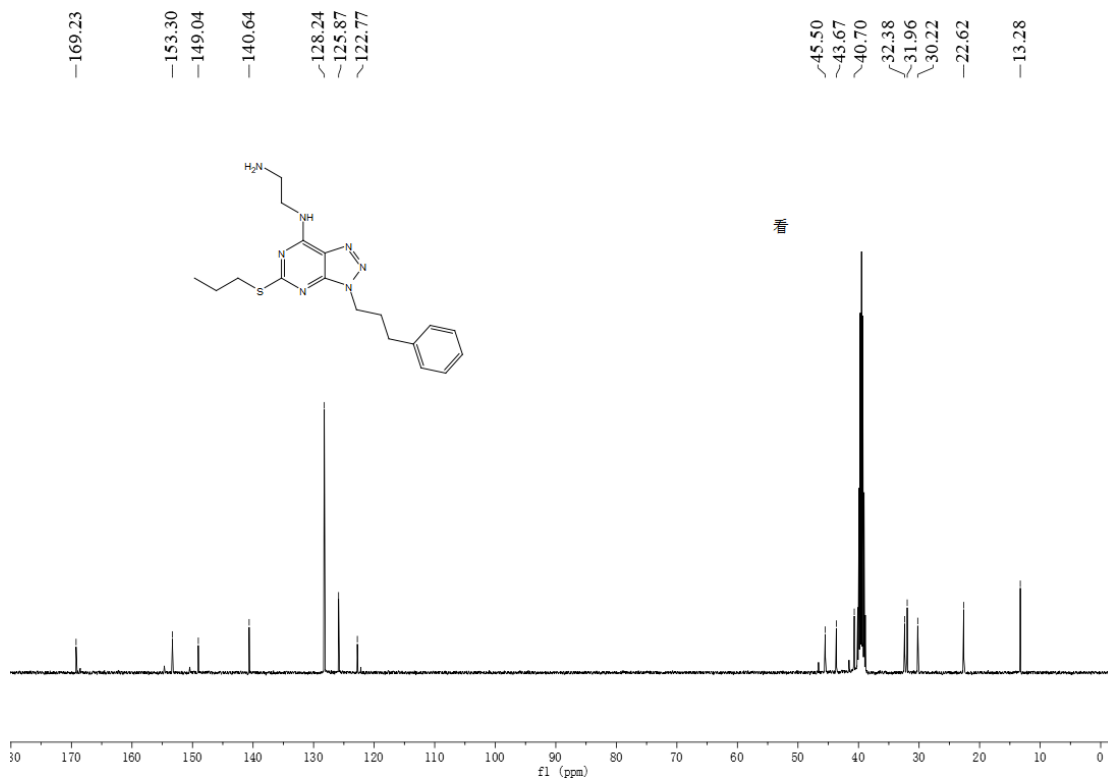

MS spectrum of compound **14**

**138**

LHM-4789 1 (0.017) AM (Cen,4, 80.00, Ht,5000.0,0.00,1.00); Sm (Mn, 2x3.00); Cm (1:9)

TOF MS ES+  
651

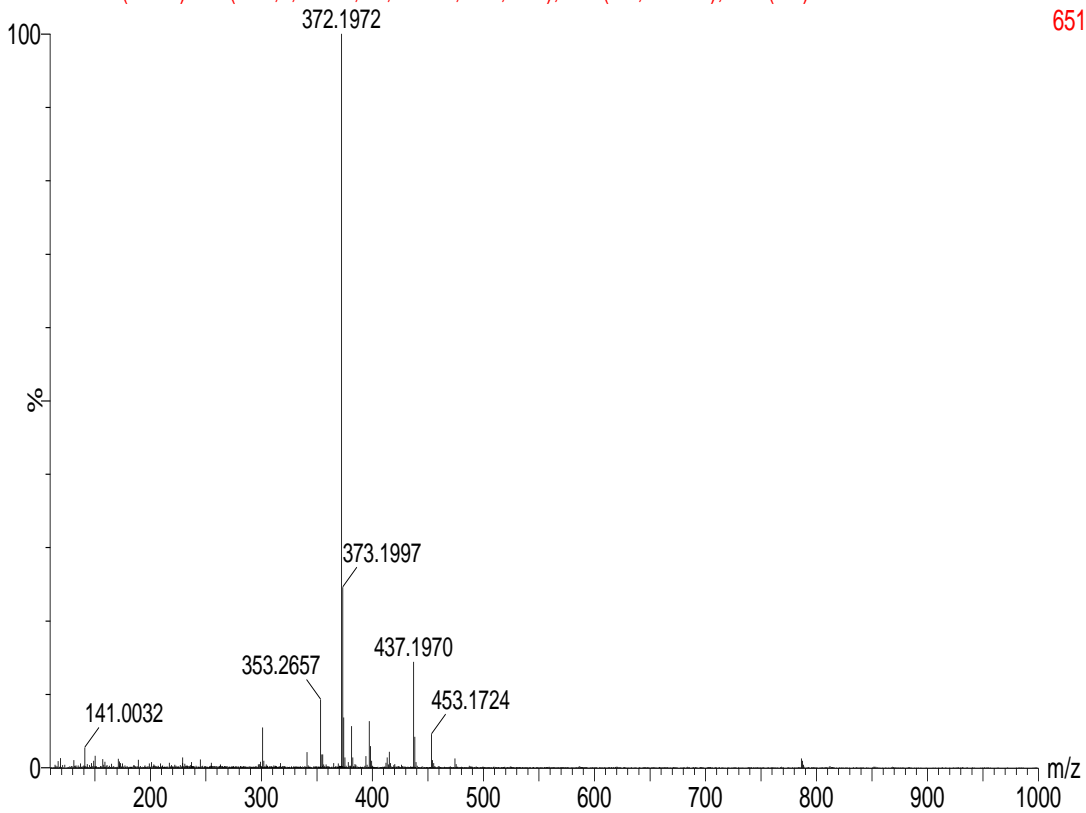

### <sup>1</sup>H NMR spectrum of compound 15

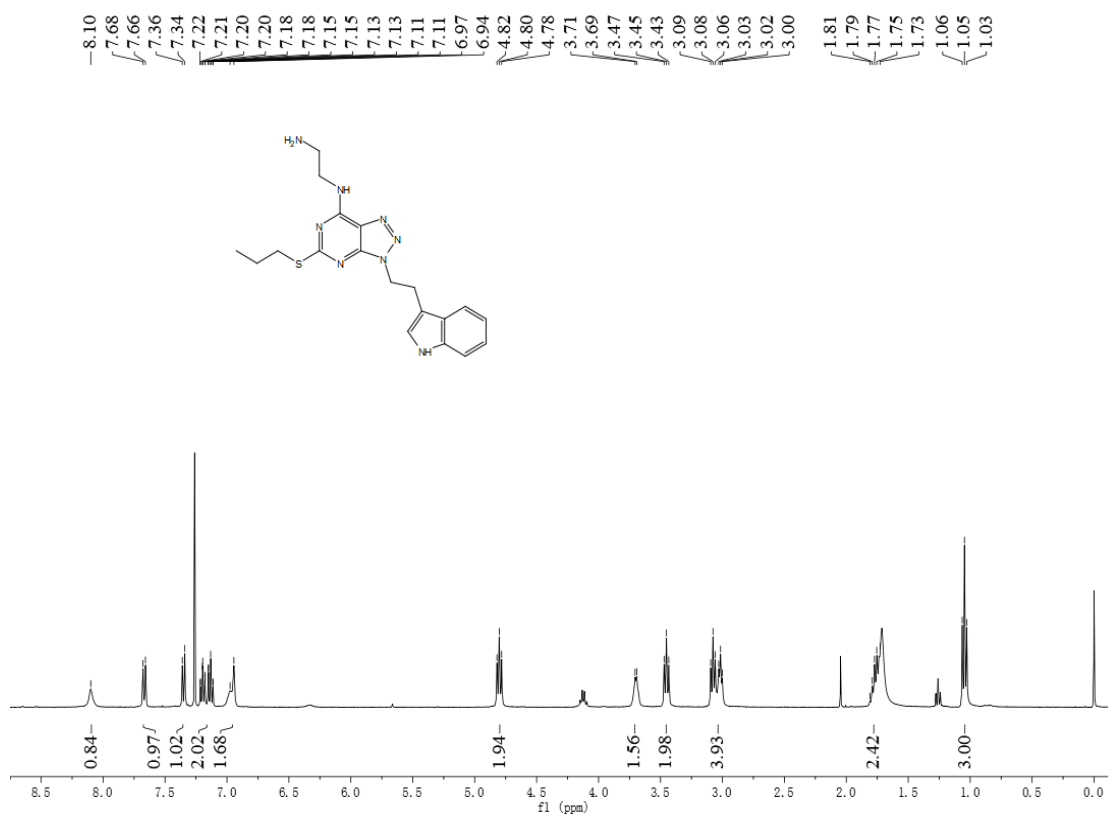

### <sup>13</sup>C NMR spectrum of compound 15

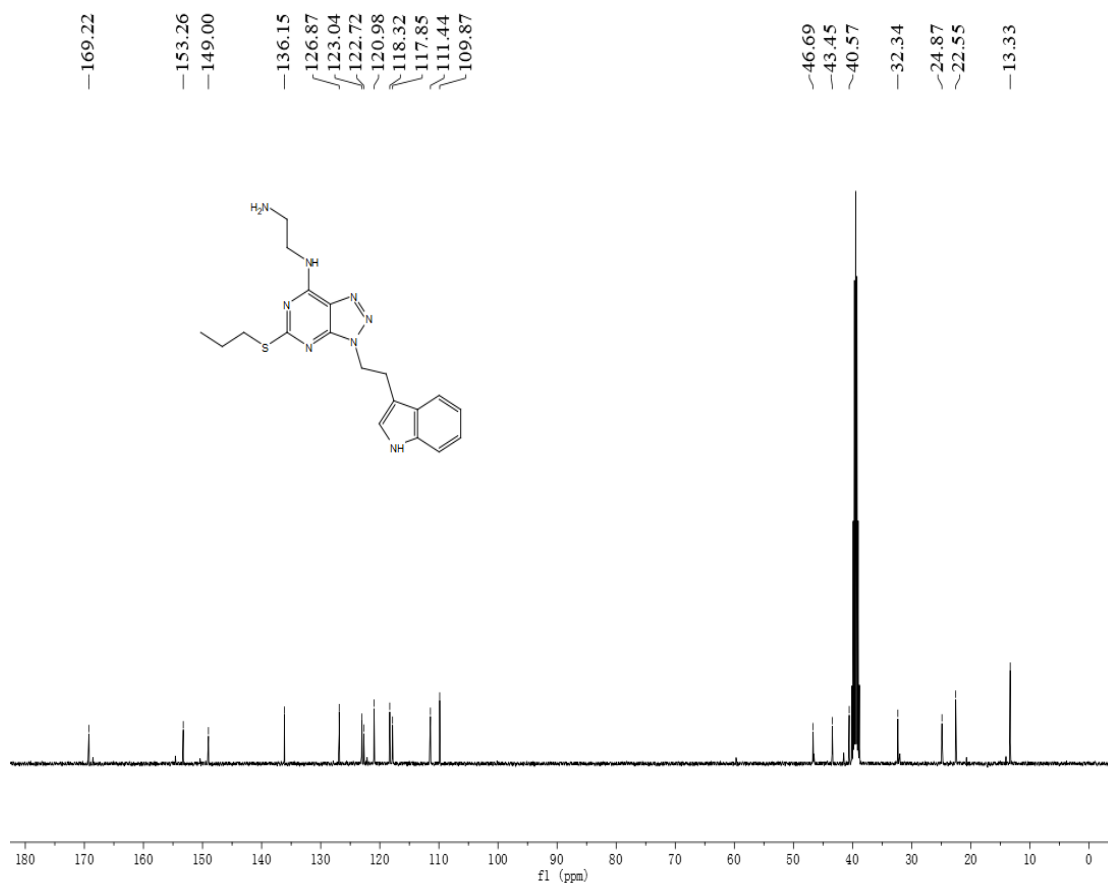

# MS spectrum of compound 15

134

LHM-4785 2 (0.034) AM (Cen,4, 80.00, Ht,5000.0,0.00,1.00); Sm (Mn, 2x3.00); Cm (1:10)

TOF MS ES+  
405

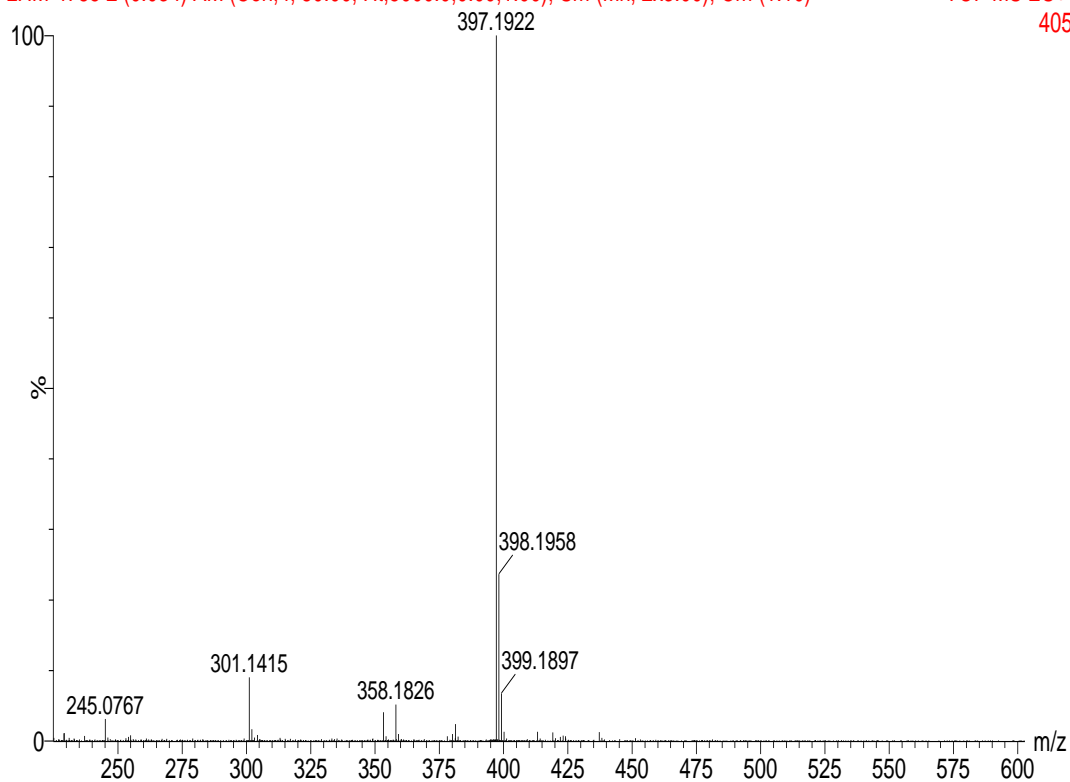

# <sup>1</sup>H NMR spectrum of compound 16

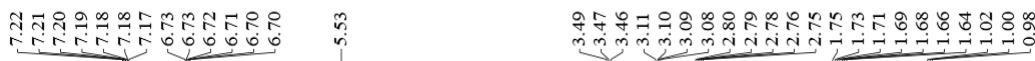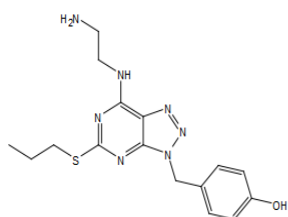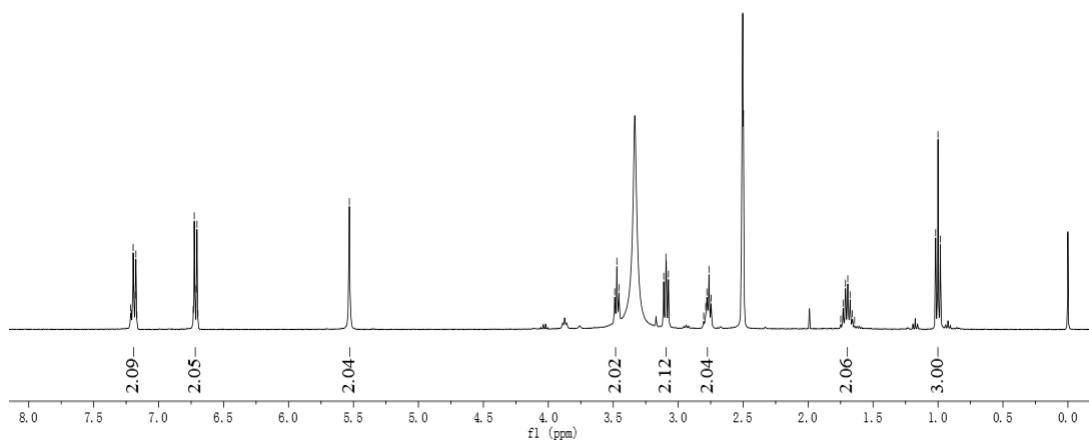



### <sup>13</sup>C NMR spectrum of compound 16

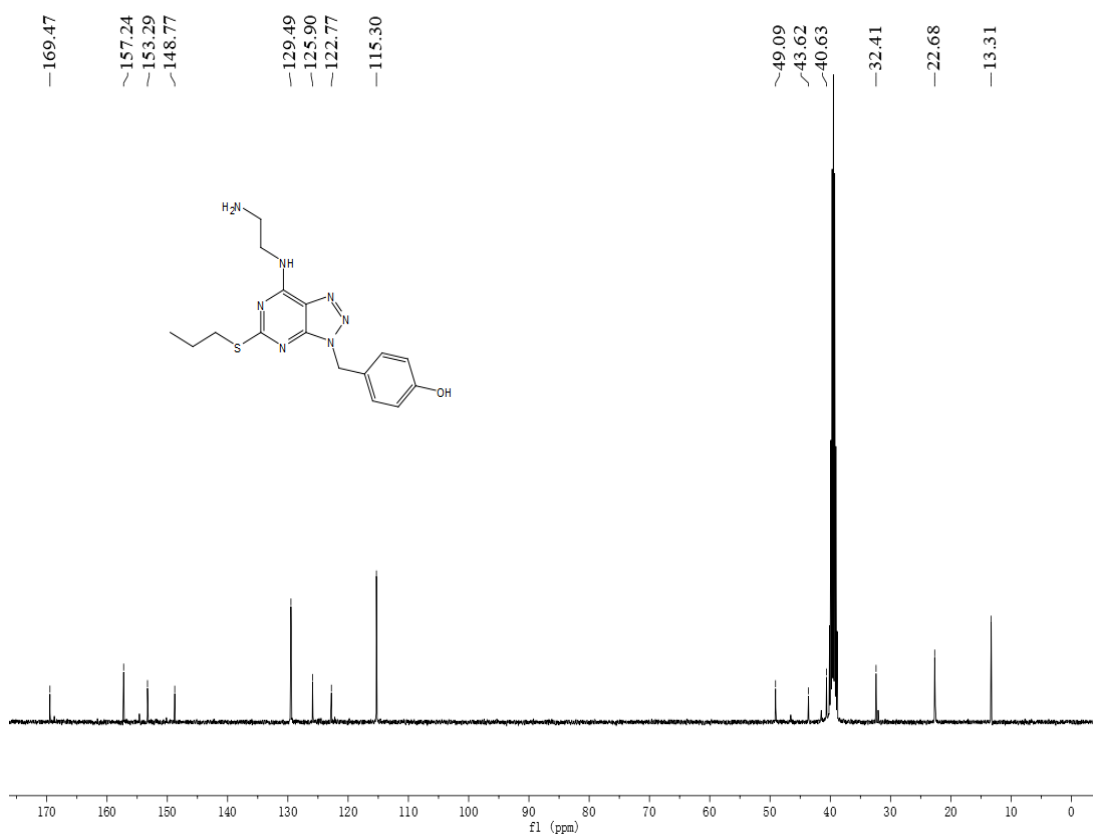

### MS spectrum of compound 16

140

LHM-4790 4 (0.069) AM (Cen,4, 80.00, Ht,5000.0,0.00,1.00); Sm (Mn, 2x3.00); Cm (1:13)

TOF MS ES+  
580

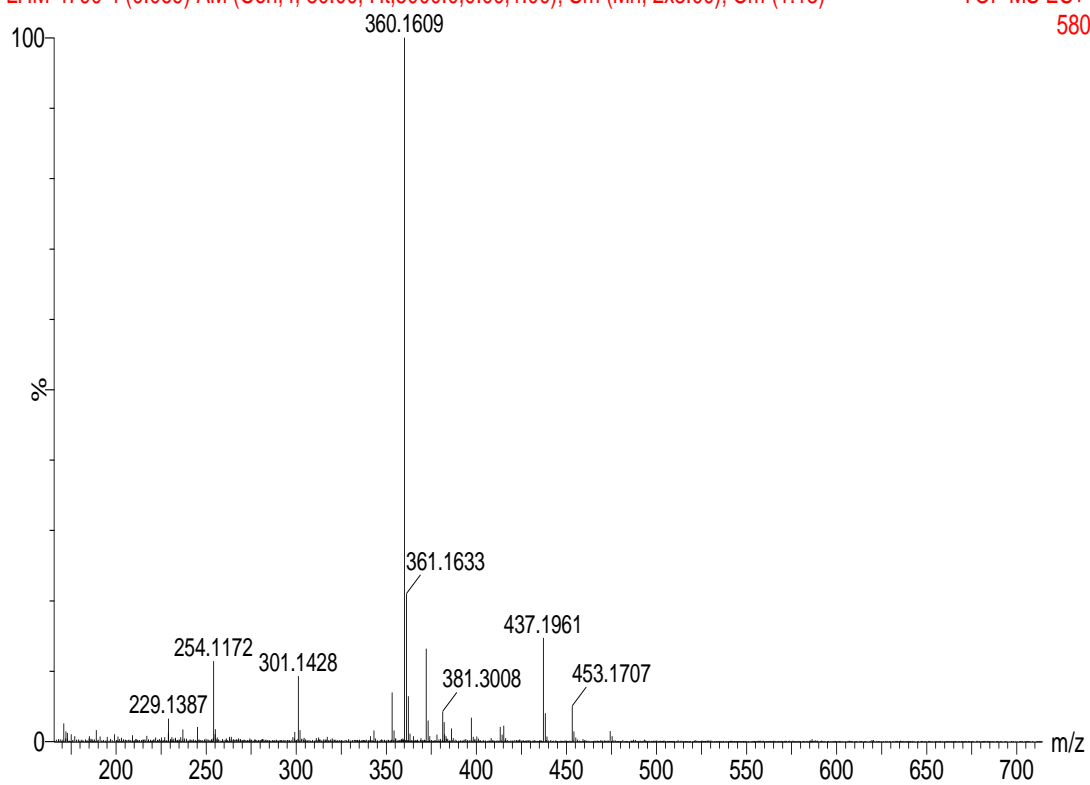

### <sup>1</sup>H NMR spectrum of compound 17

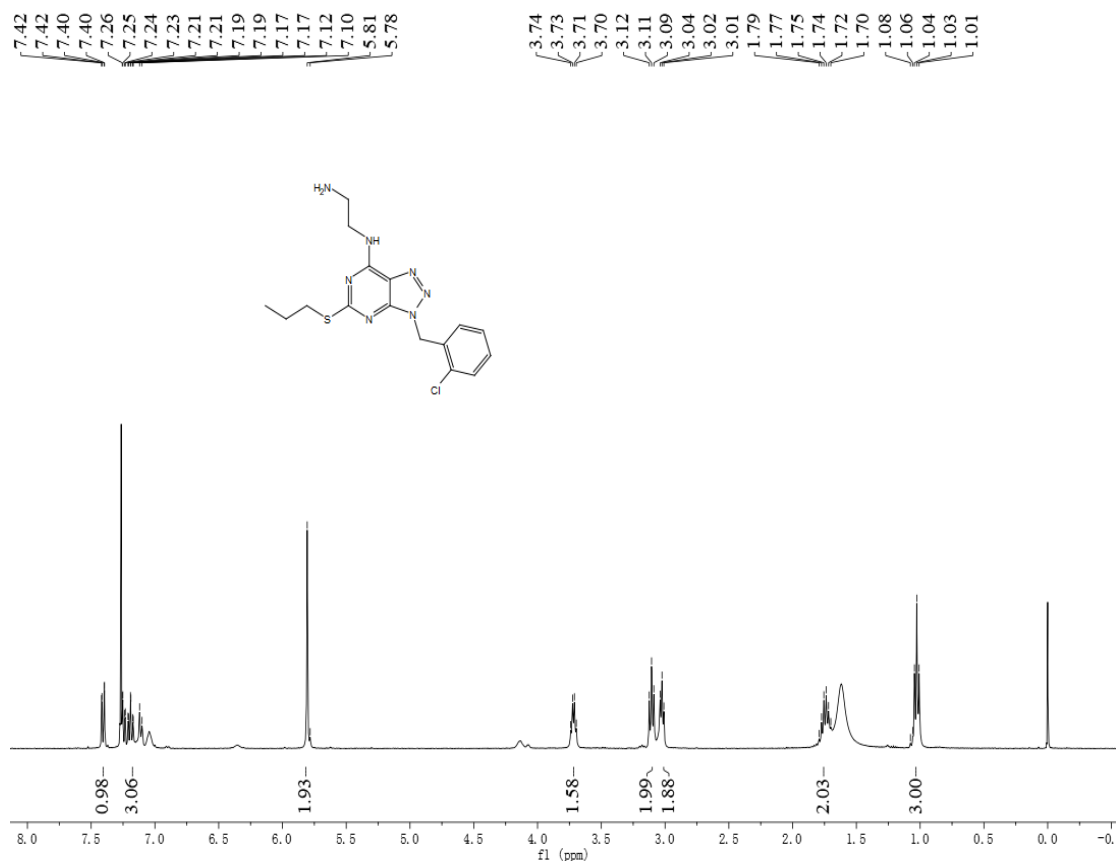

### <sup>13</sup>C NMR spectrum of compound 17

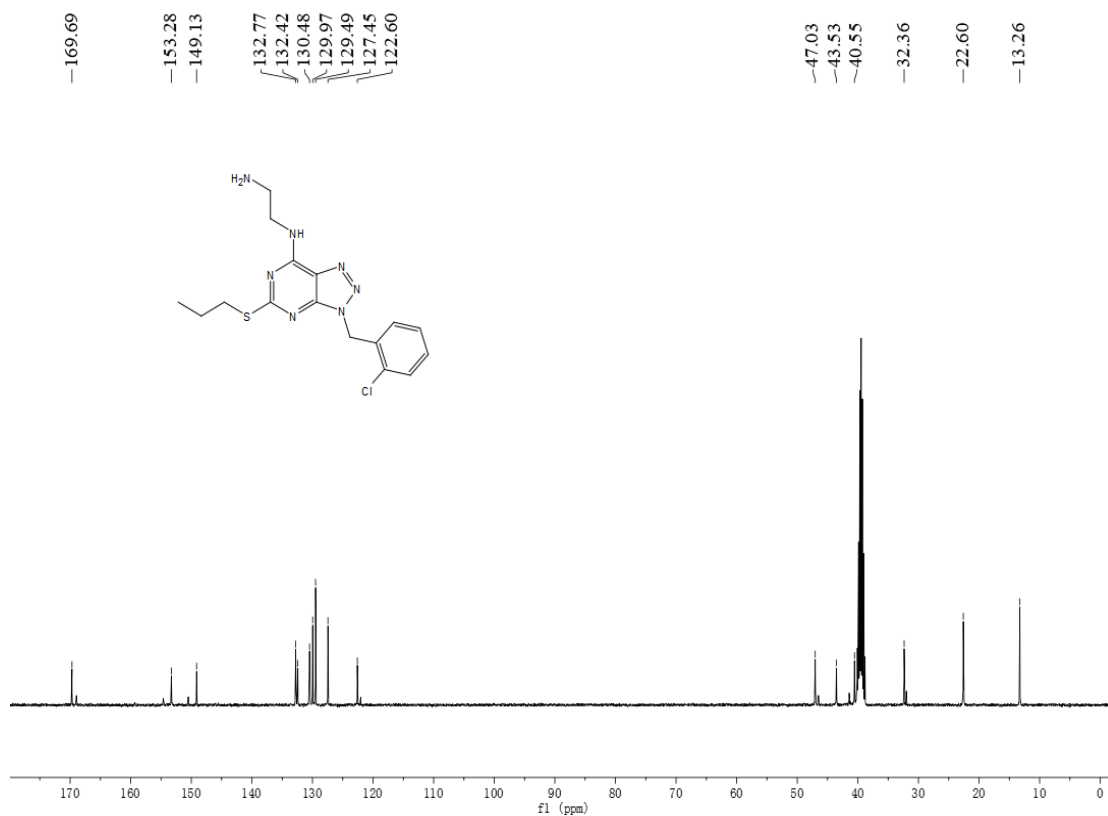

# MS spectrum of compound 17

136

LHM-4787 4 (0.069) AM (Cen,4, 80.00, Ht,5000.0,0.00,1.00); Sm (Mn, 2x3.00); Cm (1:11)

TOF MS ES+  
545

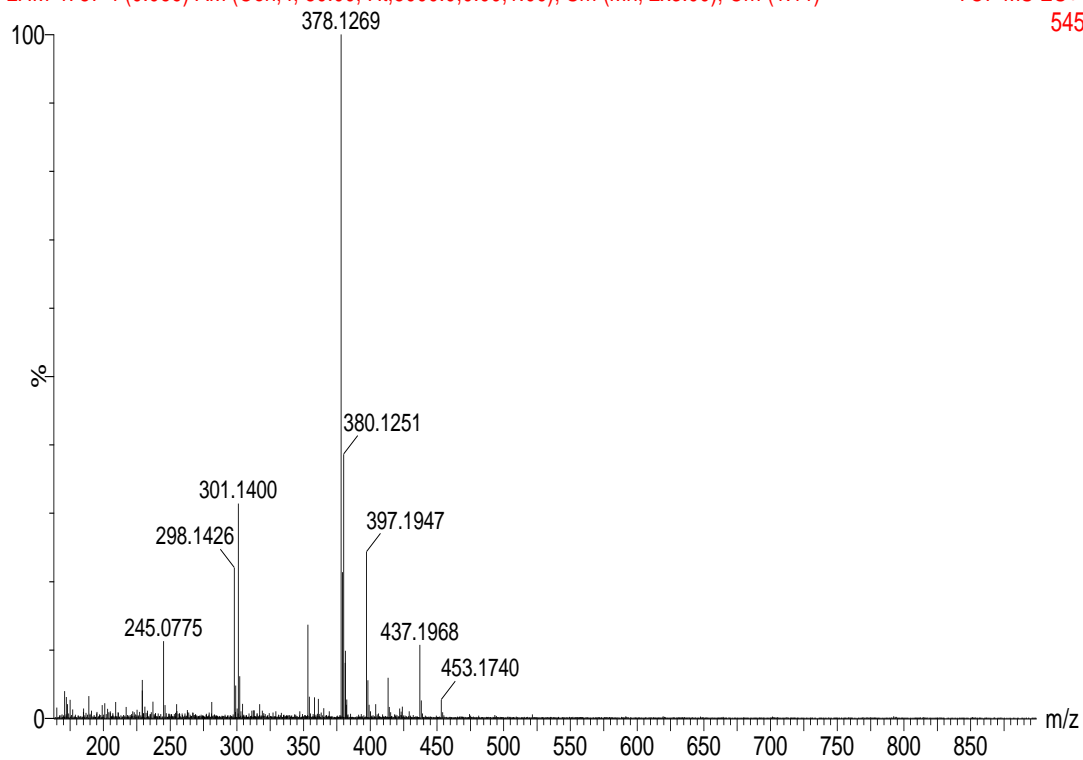

# <sup>1</sup>H NMR spectrum of compound 18

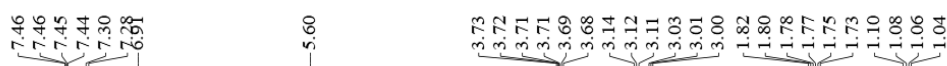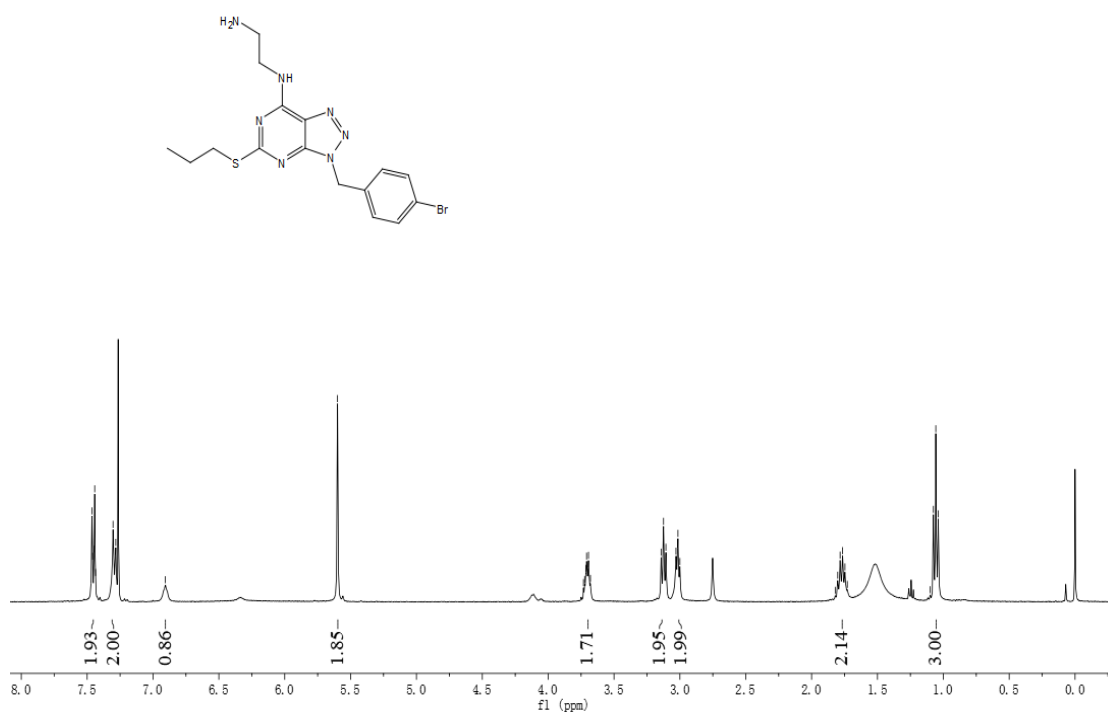

### <sup>13</sup>C NMR spectrum of compound 18

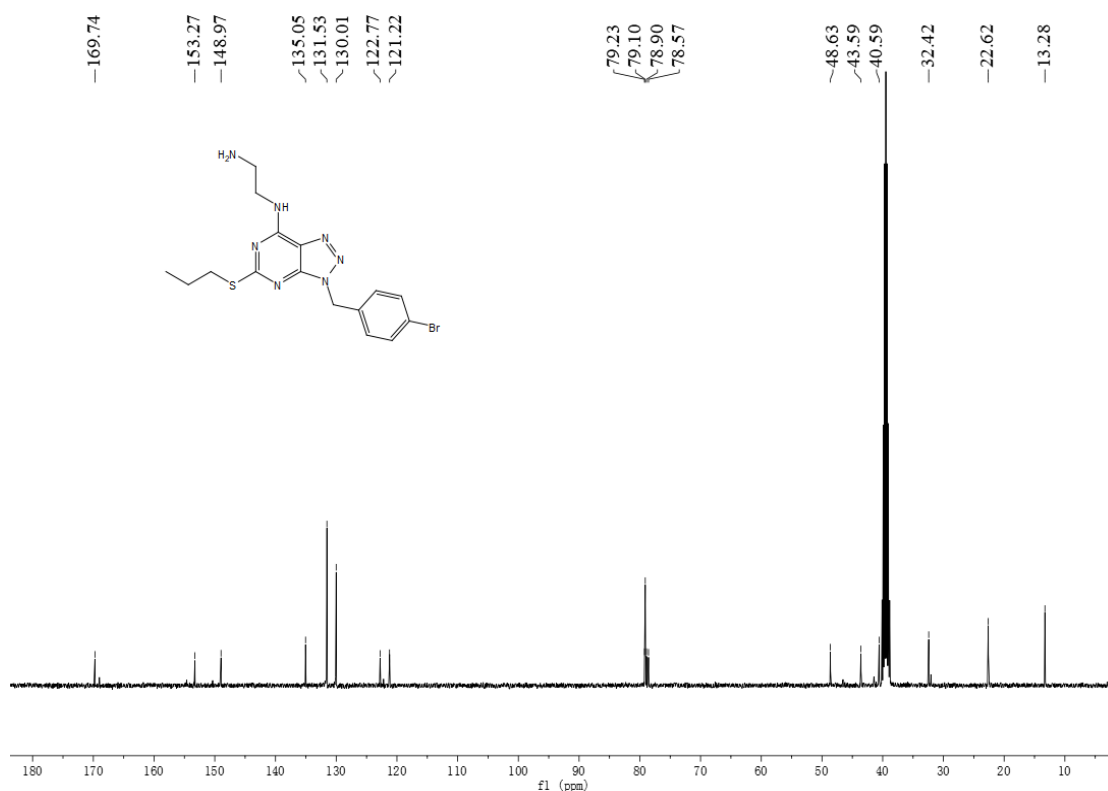

### MS spectrum of compound 18

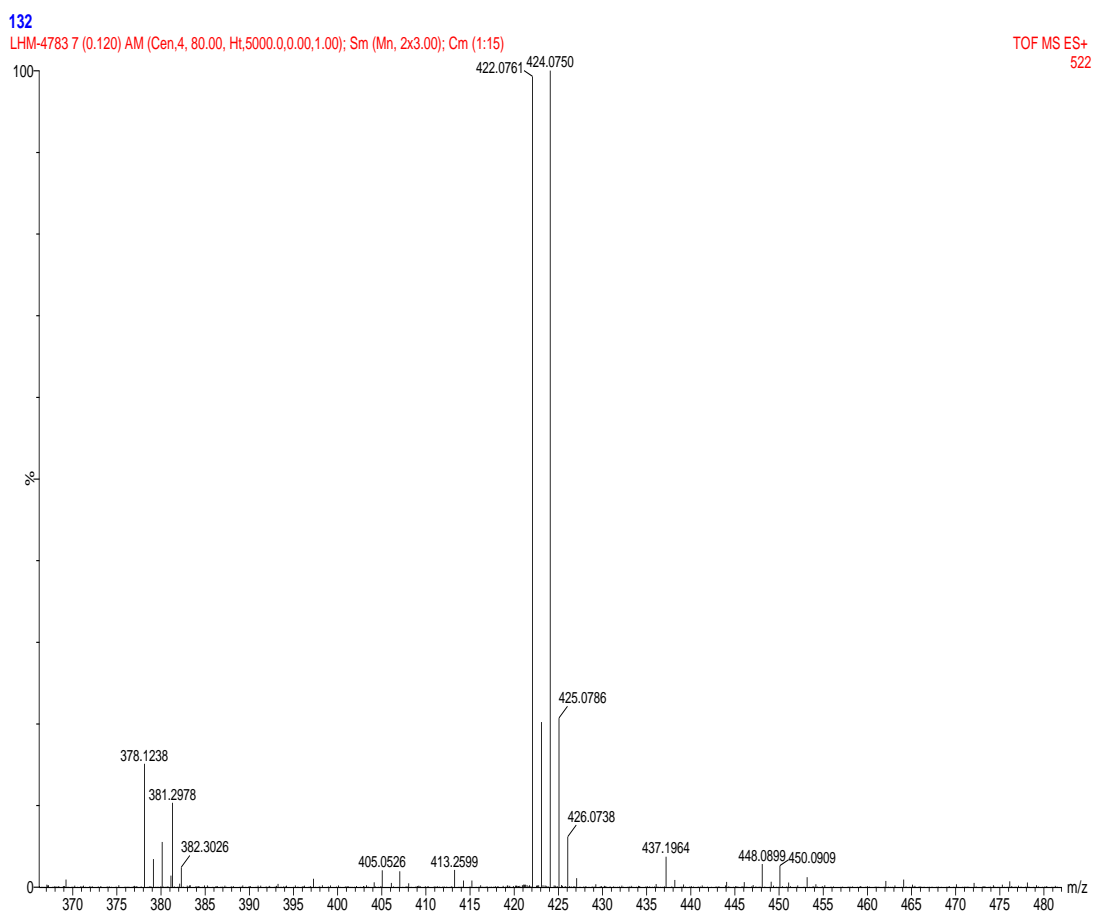

### <sup>1</sup>H NMR spectrum of compound **19**

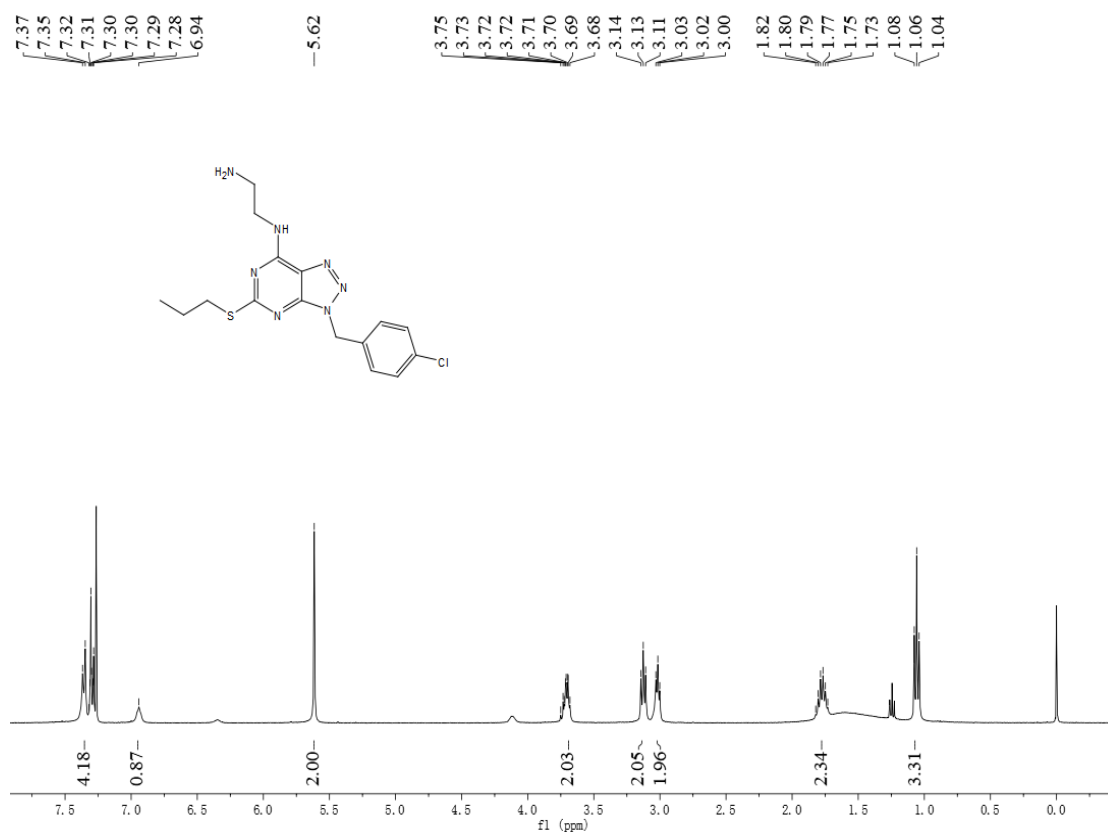

### <sup>13</sup>C NMR spectrum of compound **19**

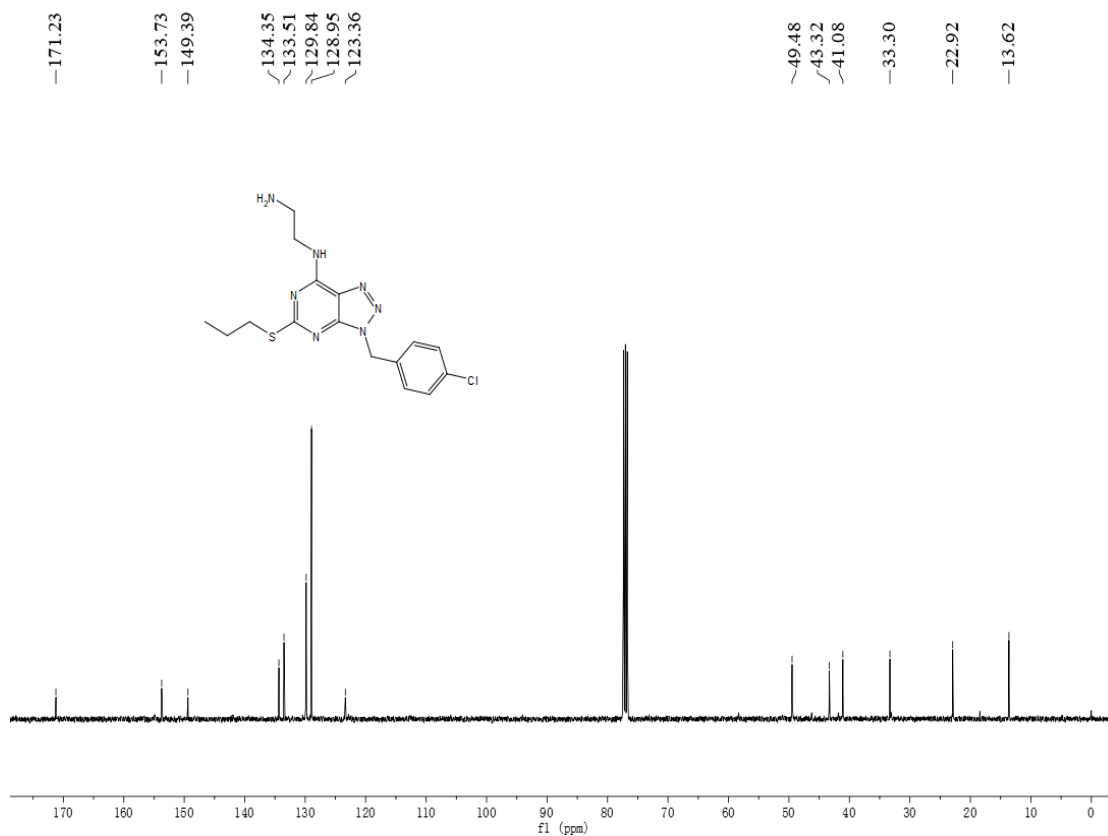

### MS spectrum of compound 19

131

LHM-4782 10 (0.172) AM (Cen,4, 80.00, Ht,5000.0,0.00,1.00); Sm (Mn, 2x3.00); Cm (1:11)

TOF MS ES+  
598

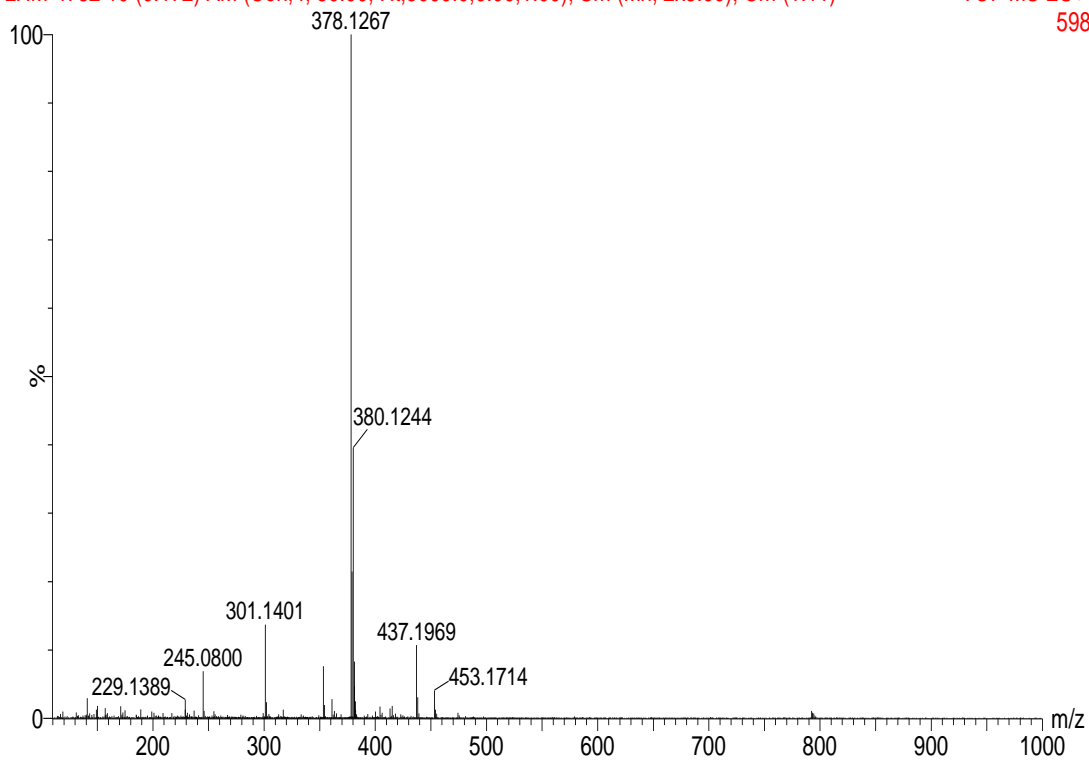

### HPLC spectrum of compound 19

#### HPLC chromatogram

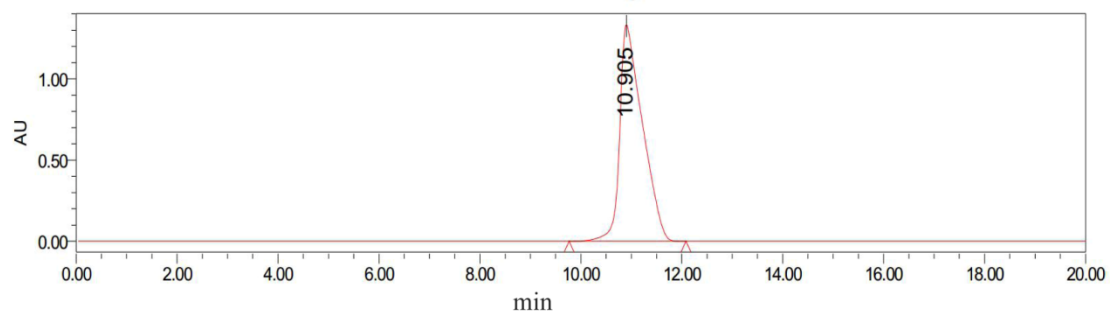

| Retention Time (min) | Area( $\mu\text{v}\cdot\text{s}$ ) | %Area  |
|----------------------|------------------------------------|--------|
| 10.90                | 41753297                           | 100.00 |

### <sup>1</sup>H NMR spectrum of compound **20**

7.38  
7.36  
7.31  
7.29  
— 6.63  
— 5.63  
3.83  
3.81  
3.80  
3.56  
3.55  
3.15  
3.13  
3.12  
1.96  
1.80  
1.78  
1.77  
1.75  
1.08  
1.06  
1.05

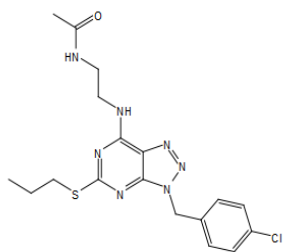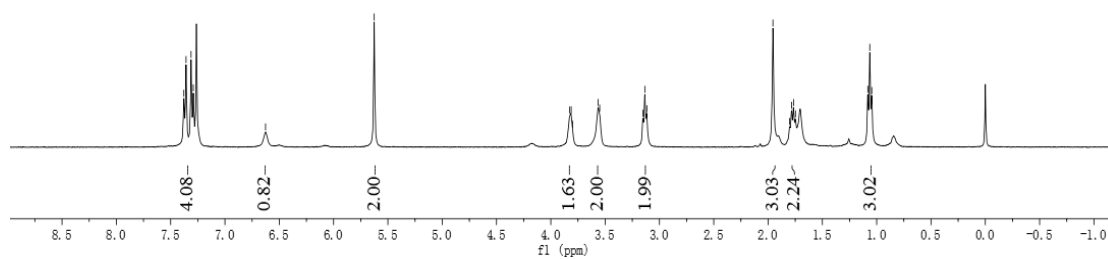

### <sup>13</sup>C NMR spectrum of compound **20**

— 169.79  
— 153.24  
— 149.01  
134.64  
132.70  
129.74  
128.65  
122.80  
48.63  
45.51  
41.08  
40.53  
32.42  
22.53  
13.25  
8.05

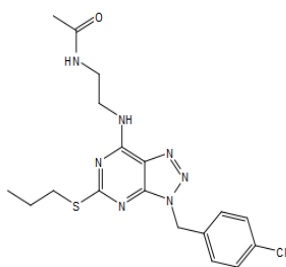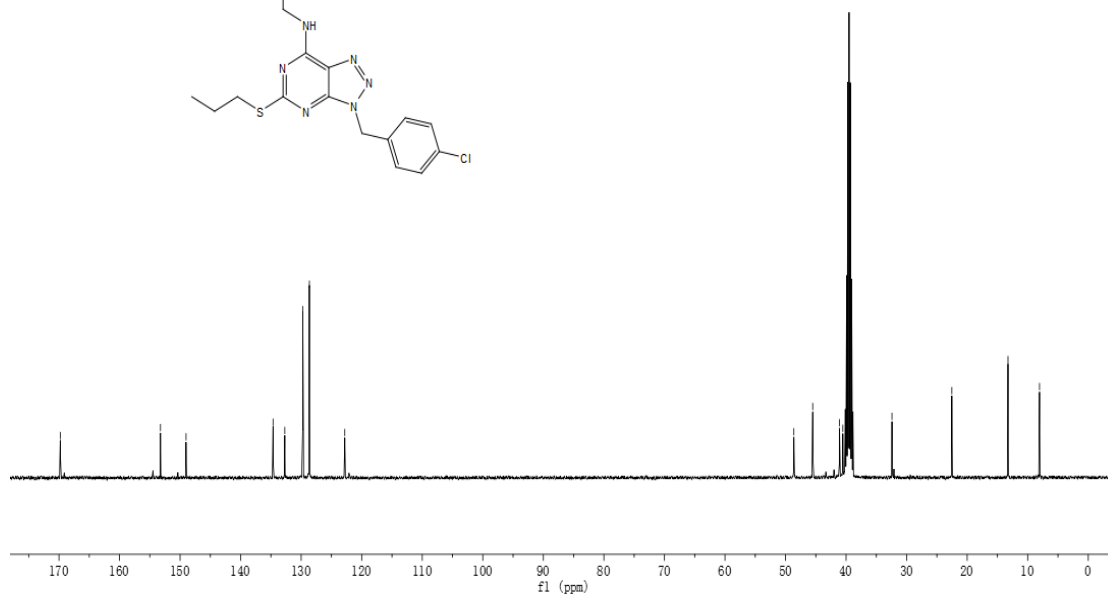

# MS spectrum of compound 20

177

LHM-4800 2 (0.034) AM (Cen,4, 80.00, Ht,5000.0,0.00,1.00); Sm (Mn, 2x3.00); Cm (1:32)

TOF MS ES+  
63.0

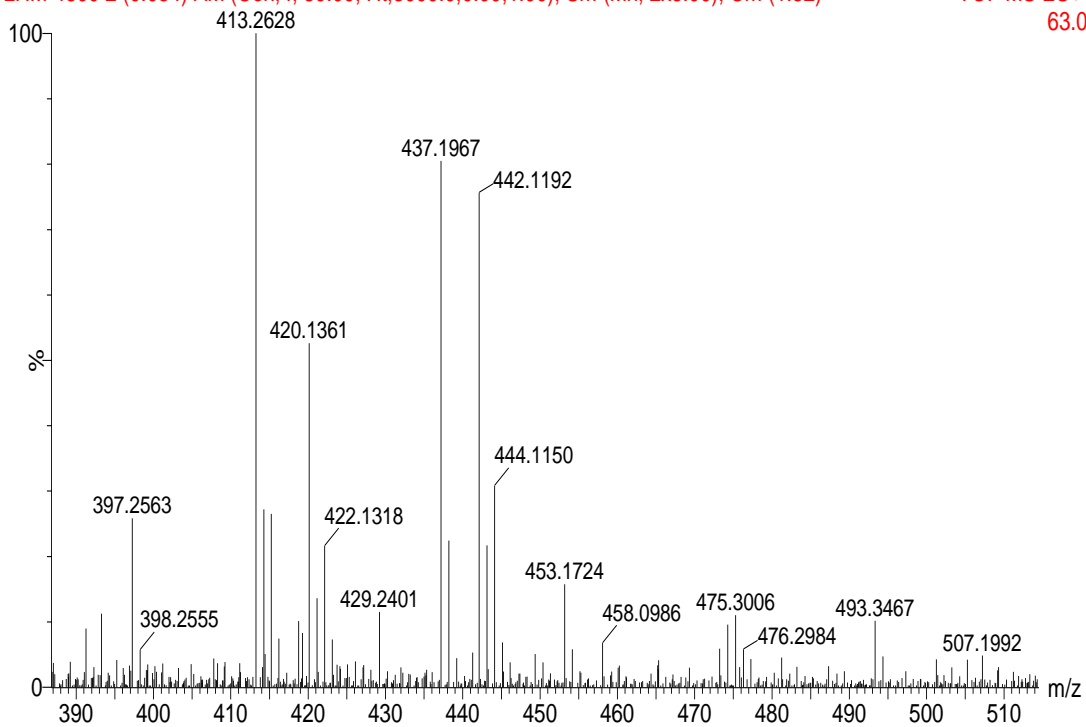

# <sup>1</sup>H NMR spectrum of compound 21

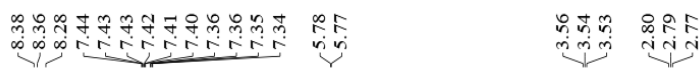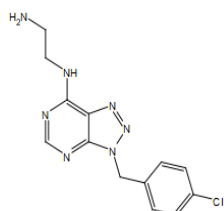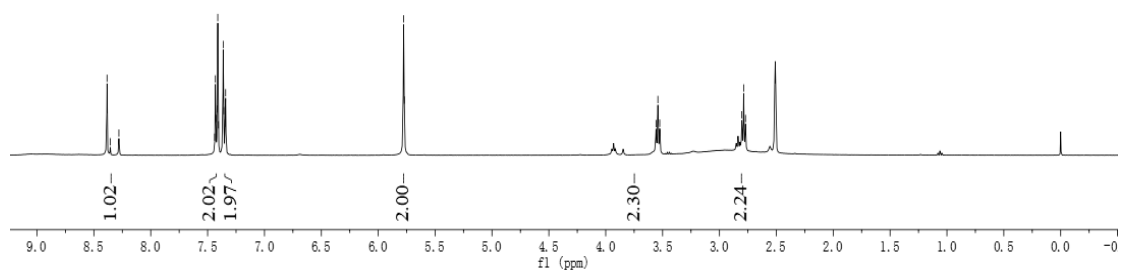



### <sup>13</sup>C NMR spectrum of compound 21

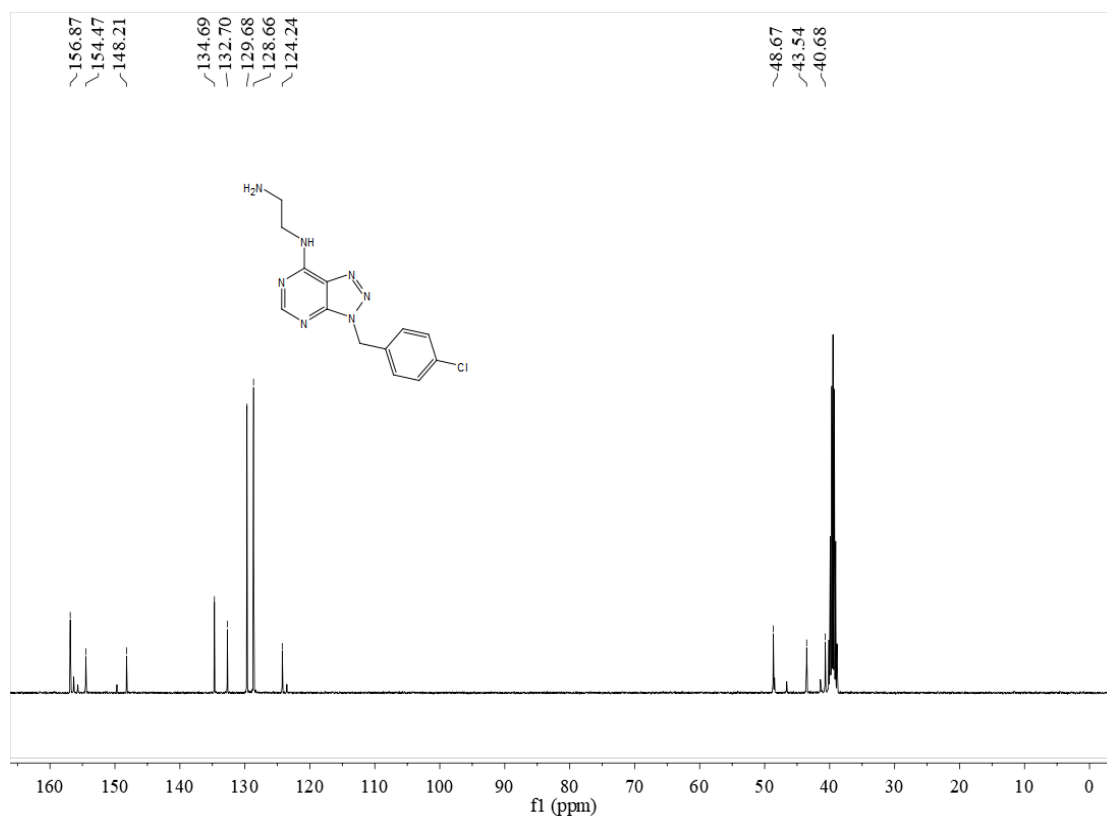

### MS spectrum of compound 21

171

LHM-4794 11 (0.189) AM (Cen,4, 80.00, Ht,5000.0,0.00,1.00); Sm (Mn, 2x3.00); Cm (1:14)

TOF MS ES+  
490

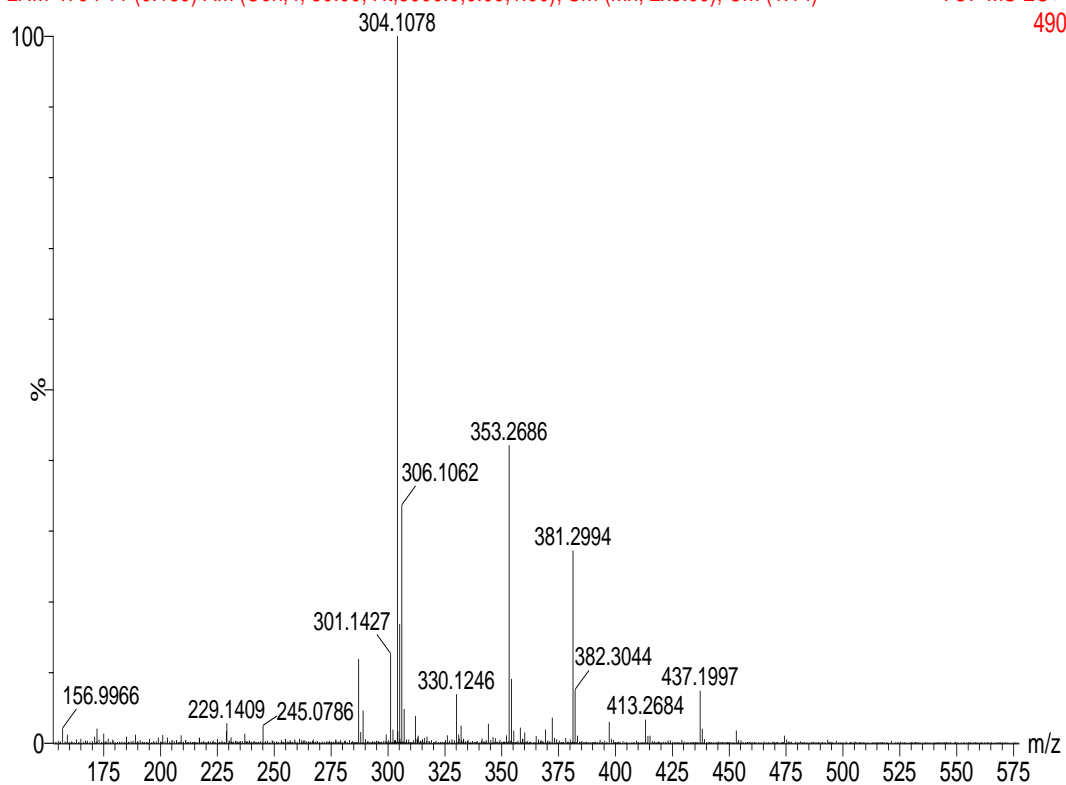

# HPLC spectrum of compound 21

## HPLC chromatogram

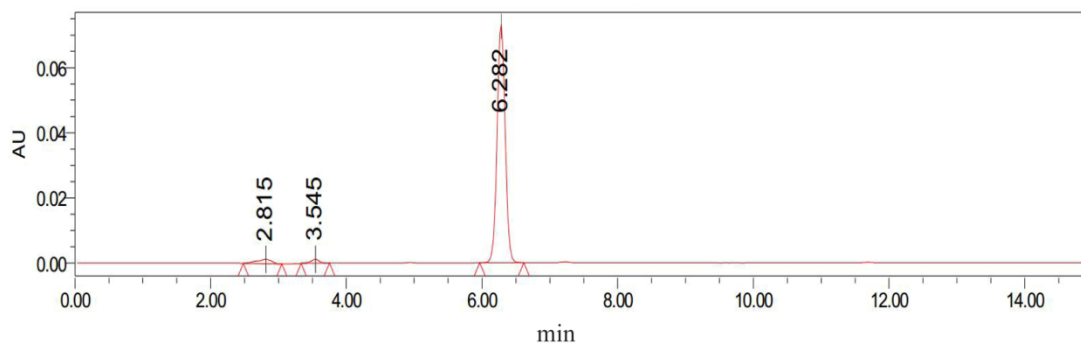

|   | Retention Time (min) | Area( $\mu\text{v}\cdot\text{s}$ ) | %Area |
|---|----------------------|------------------------------------|-------|
| 1 | 2.82                 | 21135                              | 3.34  |
| 2 | 3.55                 | 9728                               | 1.54  |
| 3 | 6.28                 | 602821                             | 95.13 |

## $^1\text{H}$ NMR spectrum of compound 22

7.42  
7.41  
7.40  
7.40  
7.38  
7.38  
7.37  
7.34  
7.33  
7.32  
7.32  
7.31  
7.28  
7.27  
7.27  
7.26  
7.25  
7.24  
7.24  
7.23  
7.23  
7.22  
7.20  
7.20  
7.19  
5.74  
5.73  
4.41  
4.39  
4.38  
4.38  
3.51  
3.49  
3.48  
2.83  
2.82  
2.80  
2.78  
2.76  
2.75

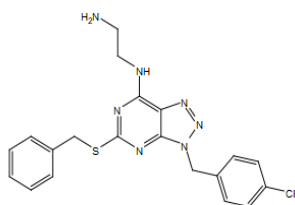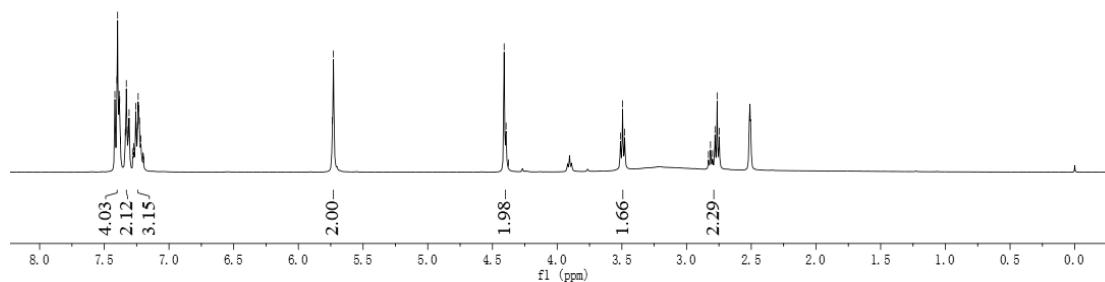

<sup>13</sup>C NMR spectrum of compound 22

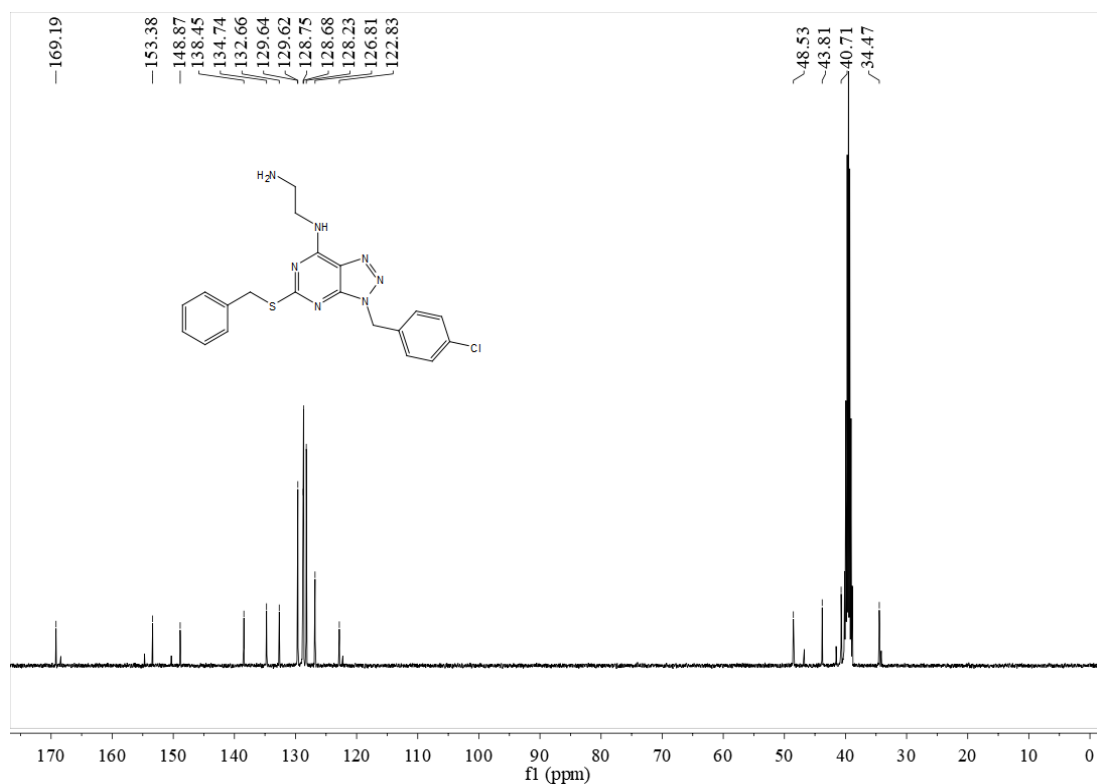

MS spectrum of compound 22

173

LHM-4796 9 (0.156) AM (Cen,4, 80.00, Ht,5000.0,0.00,1.00); Sm (Mn, 2x3.00); Cm (1:9)

TOF MS ES+  
587

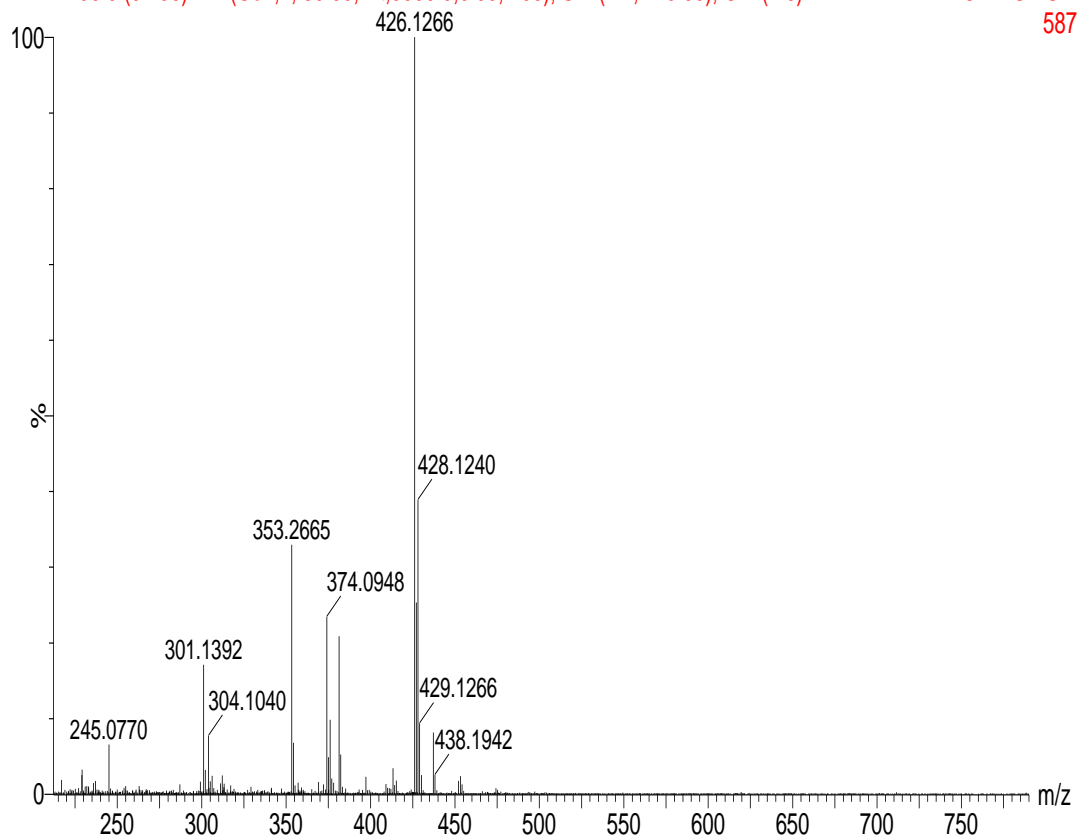

### <sup>1</sup>H NMR spectrum of compound 23

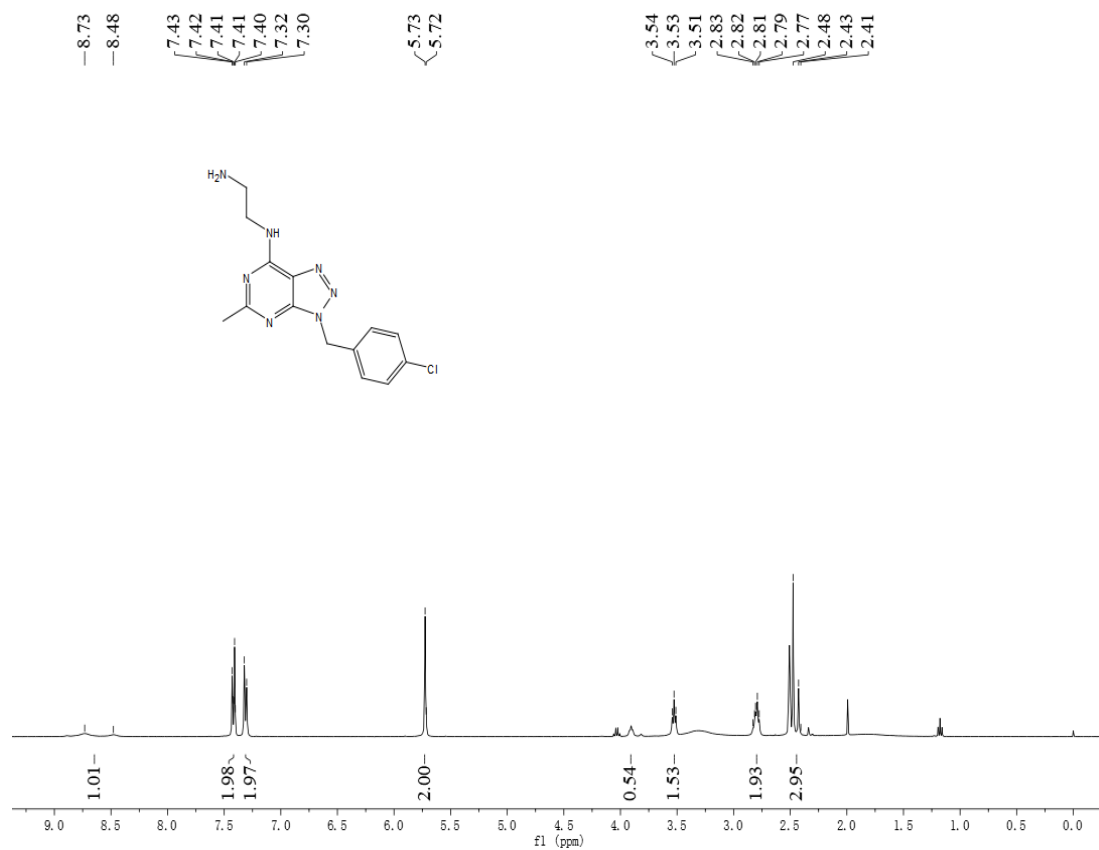

### <sup>13</sup>C NMR spectrum of compound 23

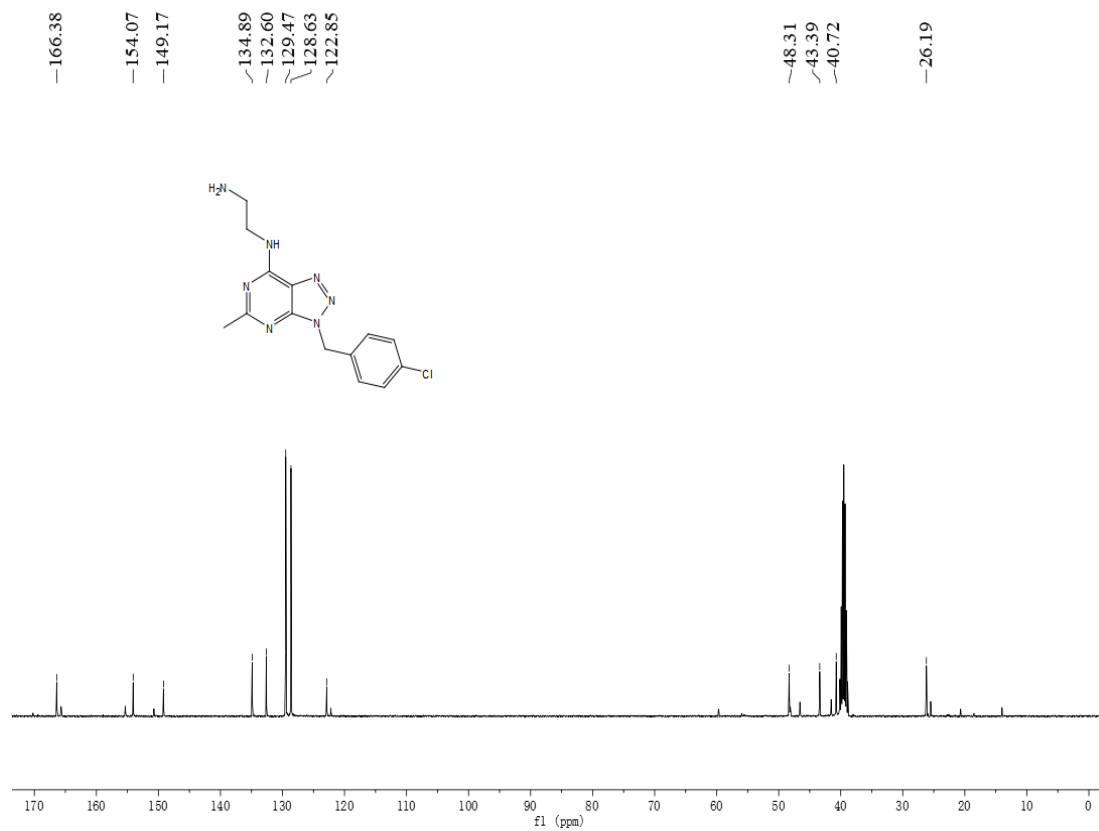

# MS spectrum of compound 23

176

LHM-4799 10 (0.172) AM (Cen,4, 80.00, Ht,5000.0,0.00,1.00); Sm (Mn, 2x3.00); Cm (1:10)

TOF MS ES+  
710

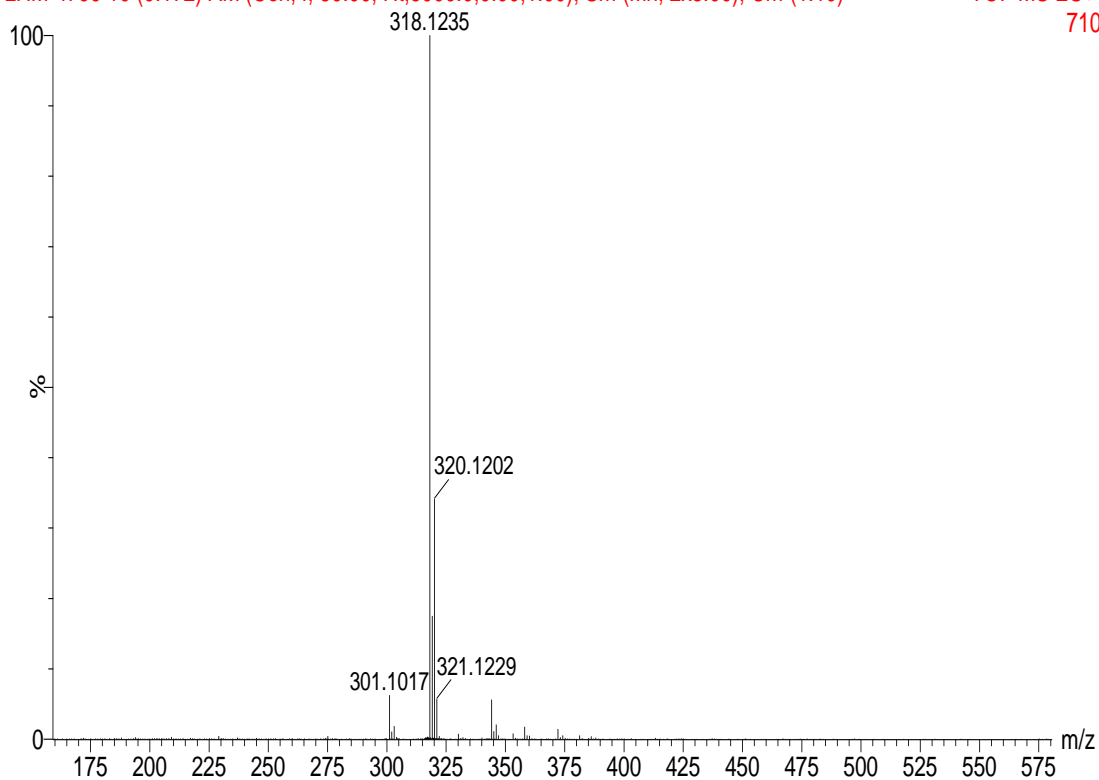

# <sup>1</sup>H NMR spectrum of compound 24

7.48, 7.47, 7.45, 7.44, 7.42, 7.42, 7.41, 7.40, 5.70, 4.01, 4.01, 4.00, 4.00, 3.53, 3.52, 3.50, 3.17, 3.16, 3.15, 2.83, 2.81, 2.80, 2.80, 2.79, 2.77

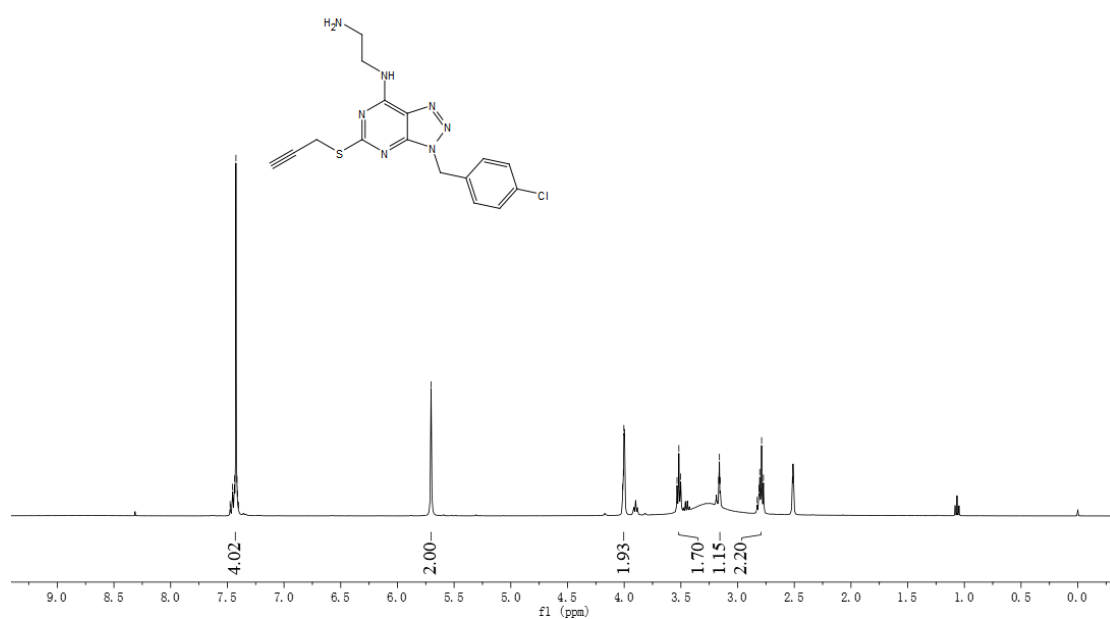

### $^{13}\text{C}$ NMR spectrum of compound **24**

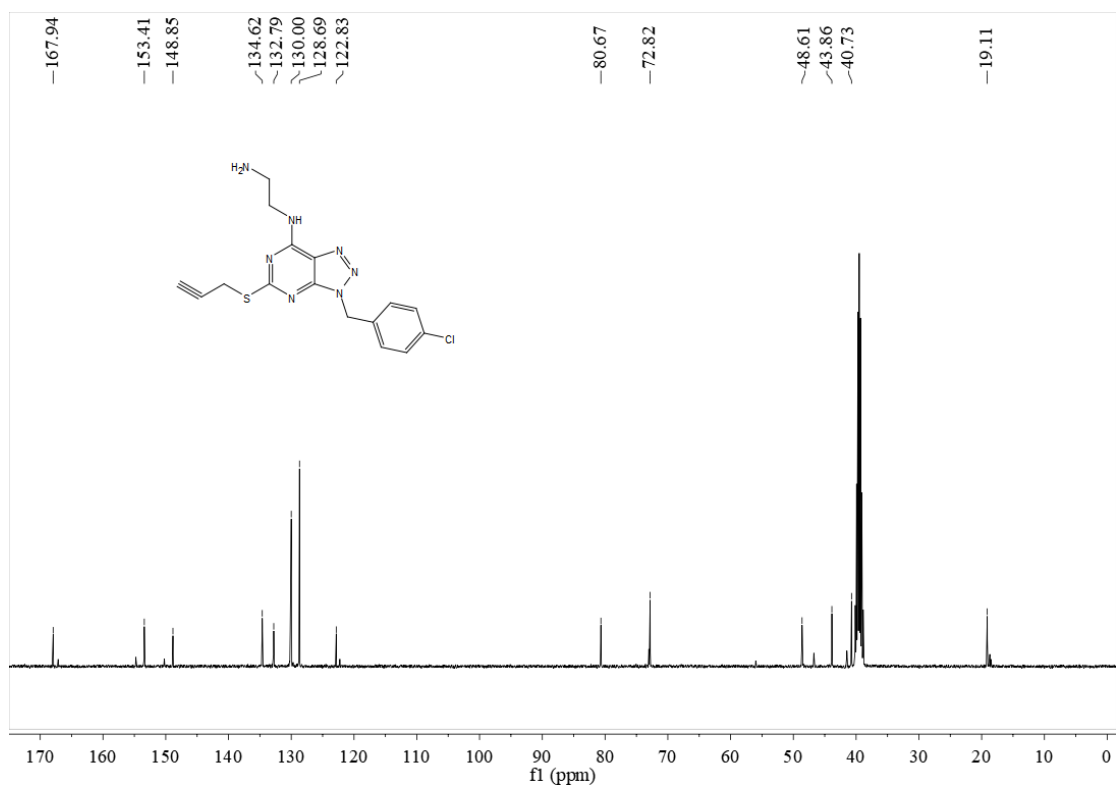

### MS spectrum of compound **24**

**172**

LHM-4795 3 (0.052) AM (Gen,4, 80.00, Ht,5000.0,0.00,1.00); Sm (Mn, 2x3.00); Cm (1:13)

TOF MS ES+  
470

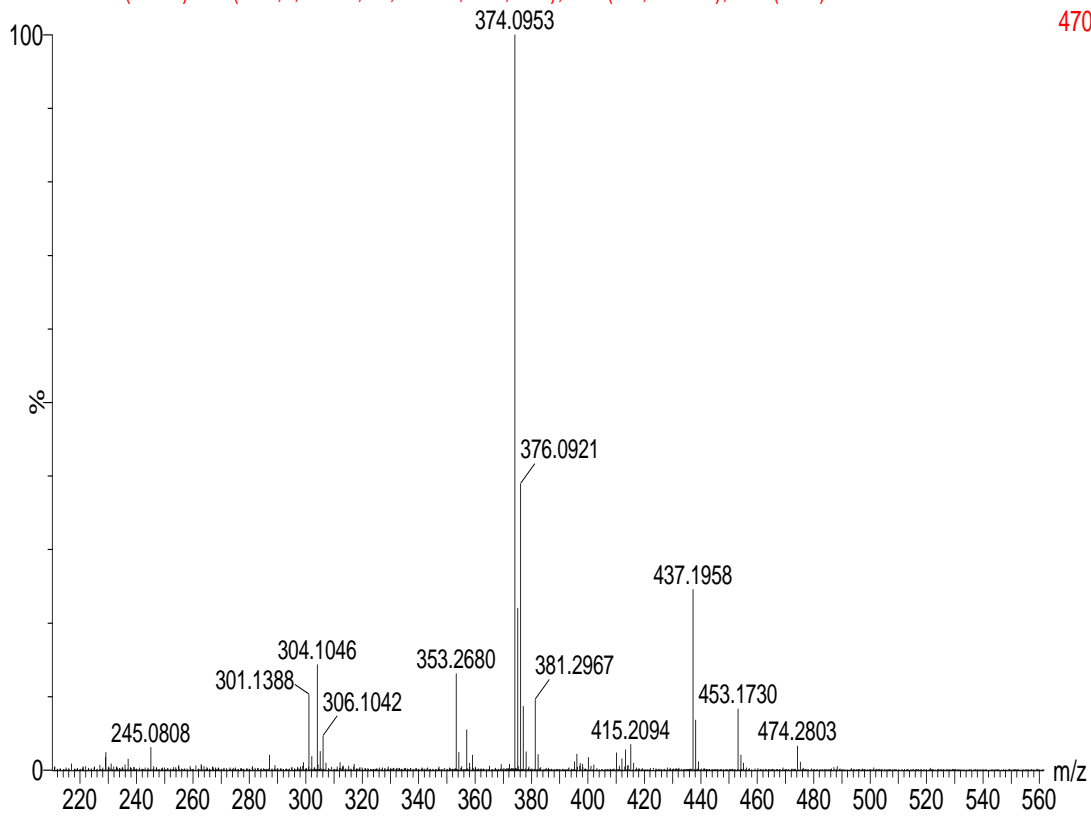

Supplement: mmc1.pdf [file mmc1.pdf]
